# Supplementary material for: Global gene expression profiling of Plasmodium falciparum in response to the anti-malarial drug pyronaridine
Source: Malar J. 2011 Aug 18;10:242. doi: 10.1186/1475-2875-10-242 (PMC3224238; doi:10.1186/1475-2875-10-242)
Supplement: Additional file 4 — Comparison of transcriptional changes between K1 and HB3 intraerythrocytic stages. [file 1475-2875-10-242-S4.XLSX]

## Sheet: average FC K1 ring
Oligo ID	avg FC
e11111_1	0.137152
f48446_2	0.227942
e24991_1	0.264733
ks135_1	0.269753
opff72415	0.28567
d2648_1	0.291331
opfd66959	0.293211
j183_2	0.299198
opfc0751	0.321587
d16785_4	0.326196
opfl0106	0.328413
n127_57	0.328976
c611	0.334714
opfl0004	0.343496
opfi17721	0.343897
j180_11	0.345203
opfh0007	0.347241
ks133_1	0.352496
n138_102	0.356923
e16439_1	0.361687
m36754_1	0.3682
m1840_1	0.386843
e3215_10	0.38925
opfi17697	0.390816
ks5580_2	0.3987
j27_14	0.403204
opfi17704	0.404072
f10141_1	0.404797
opfi17723	0.405914
n158_4	0.40909
opfi17695	0.409118
m47001_2	0.414436
ks51_12	0.418101
n134_73	0.423193
f13865_2	0.423848
ks152_10	0.423979
f69212_1	0.430459
b391	0.431829
i10869_2	0.432405
opff72412	0.433565
m38757_7	0.437037
opfk12910	0.437692
opfd66961	0.453908
ks497_2	0.45413
opfk12911	0.455954
i14812_1	0.466895
d17715_10	0.470318
opff72462	0.475935
opfblob0082	0.477752
e19248_5	0.478755
m49091_1	0.481164
n155_21	0.482533
opfblob0088	0.486528
kn4044_1	0.489041
j73_4	0.489138
opfd67001	0.489379
f51945_2	0.489855
opfl0038	0.489935
c676	0.4909
n143_48	0.492076
c345	0.493695
n155_34	0.49563
b536	0.496248
m18376_1	0.497226
j153_2	0.501465
z_8_60	0.503103
opfn0248	0.504794
opfn0265	0.5075
opfd66958	0.507979
e1297_3	0.510679
opfj12804	0.5113
j43_3	0.51243
n132_66	0.513478
opfblob0001	0.514299
ks202_5	0.516522
l2_224	0.516797
opfb0689	0.517072
j53_28	0.518872
j53_27	0.521308
i11448_5	0.523158
n157_1	0.524197
opfl0098	0.526341
ks565_1	0.528624
i10869_1	0.529962
kn973_2	0.530184
e6125_5	0.534098
ks202_1	0.534483
ks26_23	0.537144
i3555_1	0.538115
m29079_1	0.539465
m2610_3	0.541396
opfblob0161	0.542729
j27_18	0.544109
i15719_4	0.544197
j293_1	0.544445
kn603_2	0.544726
opff72472	0.546533
n141_51	0.548293
d16785_10	0.55028
n150_44	0.551912
f49582_1	0.552275
i660_1	0.552473
opfn0277	0.552715
e886_1	0.55276
m1254_2	0.554854
opfa32036	0.556274
b387	0.557608
ks2_14	0.558693
opfi17635	0.559795
opfl0046	0.560119
e13777_2	0.561149
opfi17725	0.562283
opfg0034	0.564113
m37773_1	0.565031
kn4298_1	0.566879
n149_13	0.568459
ks1032_1	0.568593
n159_40	0.568658
j120_17	0.57039
opfa32037	0.572507
opfn0246	0.573669
opfl0109	0.573742
m24933_5	0.573769
m30664_1	0.573985
opfi17636	0.574549
e1197_2	0.57577
f22946_1	0.577062
c387	0.577489
n132_11	0.578934
n175_15	0.580705
l1_100	0.580833
opfl0124	0.581208
m15786_2	0.581836
z_8_50	0.582726
z_2_80	0.583953
n130_4	0.586043
opfi17675	0.586483
b397	0.586683
opfn0249	0.588331
kn3081_1	0.589076
d33539_16	0.589936
e4159_1	0.590207
n231_1	0.590982
ks387_5	0.592971
m22678_1	0.593034
ks977_2	0.59451
m32813_2	0.594544
opfi17691	0.595305
m7883_7	0.597901
m16622_2	0.598392
e28350_2	0.598915
kn3360_5	0.599053
d52830_1	0.600101
b225	0.600567
f13307_1	0.601527
e25593_1	0.60287
m10202_9	0.603169
e18445_1	0.603358
f13746_1	0.603498
kn5186_1	0.60403
d17715_22	0.604881
ks506_1	0.605823
opfl0061	0.60583
m18539_2	0.605843
j564_3	0.606733
opff72442	0.606807
i1225_2	0.606911
e19248_7	0.607173
opfn0260	0.608083
ks89_3	0.609214
opfi17665	0.609475
j2951_6	0.609682
kn46_3	0.610373
kn1506_2	0.612162
e27247_1	0.612966
ks51_3	0.613109
b362	0.613558
opfi17662	0.613775
n140_4	0.614636
opfl0010	0.615949
l1_53	0.616497
opfg0048	0.616753
e18031_10	0.616786
n143_53	0.617246
opfl0080	0.617377
opfj12779	0.61862
m5172_2	0.618729
m3590_1	0.618844
opfh0016	0.619664
n141_8	0.619734
j223_4	0.621163
n128_74	0.621771
opfh0033	0.624501
f32325_1	0.625145
n165_1	0.625154
n149_3	0.626223
d33539_96	0.626452
b262	0.627628
m38913_7	0.629431
j212_5	0.631572
m35930_9	0.631695
m5949_1	0.633039
e7279_2	0.633274
n159_20	0.633924
opfblob0193	0.633992
n138_10	0.634859
n151_44	0.635335
n175_10	0.636461
i4394_2	0.636588
n140_12	0.637788
opfblob0105	0.637847
f18417_2	0.638401
m8032_6	0.638718
a31914_6	0.63942
ks586_1	0.640283
f57064_1	0.640311
e16790_7	0.640362
n134_131	0.64066
m8199_4	0.64077
i15363_2	0.642145
d33539_66	0.642534
ks533_1	0.644479
m11919_1	0.644835
i8675_1	0.64649
m8047_1	0.64676
ks12_6	0.64703
opfi17706	0.649302
e4387_1	0.649361
c230	0.649575
i15858_1	0.649613
opfm60467	0.650108
m21665_2	0.652389
opfc0758	0.652622
opfm60499	0.653057
z_2_50	0.653168
d16785_3	0.654388
opff72460	0.65504
b405	0.655557
d55287_1	0.655578
n134_44	0.657405
c199	0.65761
i7438_2	0.657967
m364_2	0.658331
b530	0.658333
f46067_4	0.658389
b145	0.658737
n130_29	0.659691
opfh0014	0.65977
z_7_80	0.660027
f18417_1	0.660511
z_6_90	0.661097
f52907_2	0.661168
e15896_1	0.661608
n168_30	0.661664
ks26_11	0.663487
m58361_1	0.663745
m37080_3	0.663809
ks97_2	0.664074
ks509_1	0.664914
b449	0.665632
opfi17682	0.665713
z_3_60	0.666176
n134_2	0.666278
ks5_1	0.66685
i12057_1	0.66692
m52144_1	0.666923
kn5186_3	0.667047
m48963_4	0.667229
n137_30	0.667641
i15544_1	0.668372
m29567_1	0.668753
m21368_1	0.668872
f30848_1	0.669072
f49644_5	0.66943
m48629_1	0.669518
opfl0102	0.66952
m31208_5	0.66952
b326	0.669721
f69158_1	0.66982
f47864_1	0.670105
d33539_28	0.670452
f42564_1	0.671212
d12635_22	0.671382
m33739_10	0.671819
b437	0.671965
ks667_1	0.672417
m53642_1	0.672431
j181_9	0.672521
j53_37	0.672543
b344	0.673214
n173_5	0.673779
m42506_1	0.674091
m24561_22	0.674127
b588	0.674469
n181_2	0.674511
ks25_17	0.674546
ks85_8	0.674556
ks44_1	0.674717
opfl0009	0.674961
opfi17708	0.675506
z_7_70	0.67556
m26091_3	0.675678
n137_21	0.675988
opfg0049	0.676356
m43418_2	0.67643
opfi17738	0.676554
m21780_2	0.676662
m8686_5	0.67703
n138_70	0.677354
f37098_2	0.677403
e22273_1	0.677793
m4548_2	0.678332
ks66_7	0.678799
opfblob0010	0.679845
m26251_1	0.679846
d23156_40	0.679922
e20800_1	0.680296
n150_9	0.680363
kn459_3	0.68089
opfc0754	0.681535
j33_21	0.682106
kn3190_1	0.682251
n175_16	0.682633
b541	0.683229
kn569_3	0.68354
ks838_1	0.683681
c123	0.68372
f16449_1	0.684994
ks1032_5	0.685107
f13784_1	0.685174
ks89_2	0.685206
ks59_3	0.685637
a31914_2	0.685858
c240	0.686072
f54828_9	0.686171
b428	0.6862
f24511_1	0.686514
f5206_4	0.686684
kn8391_1	0.687203
opfm60513	0.687268
e21208_1	0.687494
m35930_10	0.6877
e13013_1	0.687728
opfd67013	0.688125
f12867_3	0.688359
m22545_1	0.688402
a13725_4	0.688678
b73	0.688733
e18868_1	0.688923
opfblob0040	0.689067
f7809_2	0.689385
m26739_1	0.690105
d13582_1	0.690924
f23916_1	0.691202
n157_4	0.69127
m19188_9	0.691513
m33512_1	0.692019
j104_1	0.692189
e18031_6	0.692244
m2305_1	0.692579
a14195_3	0.692743
kn7854_1	0.693381
kn10286_1	0.694328
f20870_2	0.694347
d23156_27	0.694447
ks98_5	0.695085
opfblob0012	0.695448
ks186_10	0.69549
n143_55	0.695743
i4547_1	0.695787
f35860_1	0.696488
opfi17634	0.696822
m6522_4	0.697071
a13725_9	0.697775
e4099_5	0.697844
n150_60	0.697956
f27079_1	0.698359
b511	0.698583
e8769_2	0.698598
j40_6	0.698748
opfn0288	0.699105
n175_6	0.699393
f11089_1	0.699558
m43799_10	0.699601
n132_109	0.70086
opfk12915	0.701459
z_3_80	0.702019
c277	0.702261
f69174_1	0.702419
f35531_1	0.702535
d27403_1	0.70263
kn945_3	0.703104
n132_97	0.703304
d4722_1	0.703962
i14670_5	0.70416
j85_3	0.704318
ks101_8	0.704998
c422	0.705159
d49176_39	0.705184
f960_1	0.705763
opfm60525	0.705862
opfi17711	0.706408
i6851_1	0.706607
kn6869_1	0.707294
ks44_3	0.707963
opfg0061	0.708579
n179_2	0.709034
l2_199	0.709088
f11682_2	0.709105
f17508_1	0.70916
opfj12795	0.709283
m45177_20	0.709603
e25790_1	0.709802
opff72413	0.70999
n149_1	0.710118
j65_1	0.710235
f25464_1	0.710415
m35935_2	0.710432
n132_133	0.71045
opfd66996	0.711334
n149_12	0.711548
ks25_1	0.71184
km3535_1	0.712028
e15790_1	0.712096
d6287_29	0.712337
d15909_2	0.712425
f48433_1	0.712871
c54	0.713468
d33539_76	0.713828
m39175_1	0.713889
n134_66	0.714078
m1886_1	0.714127
c441	0.714372
kn479_3	0.714702
ks82_3	0.71479
d23156_20	0.715643
m48963_5	0.715677
ks1071_3	0.715849
n134_141	0.716205
opfl0145	0.716362
e26853_1	0.716529
kn5081_1	0.716702
b347	0.717551
f17609_1	0.718155
n157_12	0.718164
c558	0.718217
n189_5	0.718268
a14801_2	0.718271
d49176_35	0.718552
opfd67015	0.718586
ks8267_1	0.718614
n128_92	0.719008
m45177_18	0.719116
c470	0.719126
z_7_60	0.71958
i16689_1	0.71968
n244_2	0.719782
opfm60506	0.720554
i1215_1	0.720692
ks51_9	0.720856
i1291_1	0.721309
ks510_3	0.721523
opfh0028	0.721534
i15363_1	0.721673
i8013_1	0.721737
f46267_2	0.721885
i15461_2	0.722099
opfg0009	0.722107
f52401_1	0.722199
opfm60483	0.722249
m43799_2	0.722375
c453	0.722467
j212_1	0.722964
i14413_3	0.722989
j541_1	0.723002
opfm60500	0.723027
n166_3	0.723146
b272	0.723314
d49942_10	0.723315
n137_50	0.723339
m58927_1	0.723731
kn2725_1	0.723813
i1393_1	0.724083
f65819_1	0.724141
f5206_9	0.724309
ks1030_4	0.725189
m57341_1	0.725445
ks83_1	0.725601
c285	0.726784
e13506_2	0.726973
d16785_9	0.72712
c386	0.727766
f713_1	0.728134
f63632_3	0.728143
n128_32	0.728146
n132_15	0.728163
e24075_1	0.728265
opfm60529	0.728404
n137_45	0.729213
f67106_1	0.729572
j53_42	0.729606
km948_3	0.729675
n128_83	0.729943
b388	0.730084
d33539_95	0.730266
kn820_1	0.730304
b171	0.730364
d33539_109	0.730403
opfc0770	0.730951
kn5587_2	0.731321
ks13_4	0.731507
ks51_6	0.731544
opfj12810	0.731613
j938_1	0.731802
n172_3	0.732319
e19631_3	0.732845
ks89_1	0.733133
m37145_3	0.733154
l2_150	0.73324
f4541_1	0.733578
d33539_31	0.733674
m43799_6	0.733863
f15289_3	0.734001
kn672_1	0.734529
j267_1	0.734935
f5206_7	0.734955
ks595_1	0.734957
i9146_6	0.735076
i15927_6	0.735216
d17715_12	0.735363
n138_104	0.735567
n130_44	0.735595
d23156_45	0.736407
m38757_6	0.736538
opfg0035	0.736791
opfc0747	0.736882
e30064_1	0.73702
n161_1	0.737172
ks42_6	0.737318
n150_53	0.73734
e18984_1	0.73744
opff72414	0.737481
ks244_8	0.737564
m3675_2	0.738012
m47319_1	0.738101
m5299_2	0.738466
i8447_1	0.738658
m43941_2	0.73906
n165_8	0.739167
i6724_1	0.739249
j590_2	0.739497
opfm60495	0.739661
n143_44	0.739817
c87	0.740212
j73_17	0.740257
n146_2	0.740518
opfl0007	0.741193
l3_6	0.741231
opfd66963	0.741302
m7985_1	0.741514
f960_7	0.74153
opfg0005	0.741882
opfi17633	0.742117
opfm60508	0.742123
e10967_2	0.742869
m6508_1	0.74325
e29567_9	0.743463
n151_64	0.743494
opfi17680	0.743889
f61158_1	0.743925
j318_2	0.744165
i11401_2	0.744443
f49644_2	0.744834
a13725_6	0.744934
opfblob0007	0.745045
d17715_140	0.745058
opfl0108	0.745088
l2_196	0.745158
c174	0.74533
n128_97	0.745632
opfblob0094	0.745802
m35892_3	0.745809
n134_78	0.745986
f10626_1	0.746233
j120_1	0.746355
l2_57	0.746411
d49176_11	0.74669
n136_6	0.746807
e26525_2	0.74737
d33539_23	0.747459
b543	0.748128
d10917_2	0.748391
m38113_2	0.748604
m46928_1	0.748925
m31208_9	0.749468
i2739_1	0.749586
opfh0039	0.749855
kn3709_1	0.749945
f9676_1	0.750229
f20385_3	0.750253
ks1717_1	0.750545
ks8_2	0.7509
m5464_1	0.750939
c559	0.751193
opfm60516	0.751339
opfl0022	0.751344
c538	0.75152
i5180_1	0.751634
m49210_1	0.751639
n138_94	0.751677
e15771_1	0.752092
kn330_1	0.752441
kn656_1	0.75248
i13569_1	0.752542
f53897_1	0.752806
n133_58	0.752949
l2_109	0.75307
b568	0.753528
m21508_6	0.753674
e21208_5	0.7538
n134_75	0.754029
f13671_1	0.754079
j110_1	0.754083
ks3365_1	0.754227
opff72426	0.754274
f53854_2	0.754966
f31053_2	0.755429
f45342_2	0.755708
j70_1	0.75595
f64125_2	0.756207
kn1319_1	0.756552
m2511_2	0.756719
d33539_47	0.757257
i8811_1	0.758302
kn836_1	0.7586
f22081_1	0.758738
opfm60501	0.758875
opfi17681	0.759146
d32606_3	0.759232
f57982_1	0.759854
c380	0.759876
i8034_1	0.75991
z_2_60	0.76015
n130_47	0.760177
d12635_50	0.760486
i16129_1	0.760625
ks1072_1	0.761592
a24704_11	0.761751
kn3380_2	0.761811
a11025_2	0.76214
f7922_1	0.762498
m5299_3	0.762688
i5252_1	0.762838
f29632_5	0.76312
c624	0.763137
f24843_2	0.763366
m25032_3	0.763559
f64735_2	0.76358
f35197_2	0.763823
m45177_1	0.763886
ks56_32	0.764126
d23156_18	0.764311
m43376_1	0.764513
ks382_1	0.764921
m12812_6	0.765451
opfk12896	0.765828
d17715_104	0.765998
opfc0775	0.766335
f49644_4	0.766358
opfl0110	0.766362
d16785_8	0.766362
f36356_6	0.766458
c614	0.766925
ks25_9	0.767459
m6612_2	0.768024
e3552_1	0.768375
ks510_13	0.768383
m49138_2	0.768463
i12692_1	0.76906
f59084_1	0.769084
f1153_1	0.769084
n141_45	0.769162
opfd66964	0.769311
i5974_1	0.769367
n168_36	0.769419
opfl0115	0.769842
opfblob0111	0.769922
f42062_1	0.770373
f1021_3	0.770497
n153_7	0.771139
m33739_5	0.771296
f47068_6	0.771653
j73_14	0.771663
i6658_1	0.7717
n128_49	0.771822
opfm60514	0.771985
f21429_1	0.772032
m38913_8	0.772222
f10466_1	0.772467
m41547_1	0.772842
f38618_1	0.773039
e25193_1	0.773073
a8010_25	0.773098
j190_1	0.773132
b371	0.773155
n134_32	0.7732
ks2_1	0.77323
n151_37	0.773343
f50551_1	0.773461
f41218_2	0.773486
f43064_2	0.773693
m30813_1	0.773869
i4500_1	0.773933
f4524_3	0.774023
n135_14	0.774206
m45317_6	0.77451
m1222_1	0.774687
f6858_1	0.774689
e27341_1	0.774797
n141_27	0.774893
m19791_1	0.775161
f46320_2	0.775217
opfd66992	0.775463
ks56_24	0.775498
opfblob0185	0.775528
m789_3	0.775876
f52120_1	0.77601
c600	0.776553
f1021_4	0.776601
n134_61	0.776621
opfj12790	0.776635
kn1621_1	0.776732
d17715_26	0.776851
opfg0003	0.776891
ks206_3	0.776958
n148_7	0.777473
n143_39	0.77761
m8032_1	0.777652
i15505_1	0.777833
f26422_1	0.777839
ks76_9	0.778014
f56837_1	0.778045
j151_11	0.778314
l2_55	0.778561
opfblob0101	0.778621
opfi17715	0.778778
d17715_15	0.779018
n147_25	0.779347
n137_35	0.779435
n149_4	0.77945
f13529_1	0.779486
m6114_1	0.779927
i16936_3	0.779937
f8921_1	0.779951
j22_4	0.780089
j239_10	0.780166
f29767_2	0.780764
b170	0.780798
ks117_1	0.781225
f42543_3	0.781264
m45177_15	0.781533
j53_30	0.781974
n140_9	0.782079
ks173_8	0.782167
j22_2	0.782409
opfl0041	0.782651
ks436_2	0.782717
m18924_1	0.782892
kn3020_1	0.783135
e26351_1	0.783221
j45_11	0.783261
n145_20	0.783551
e16790_10	0.783571
e7871_1	0.783808
e248_3	0.783826
a15774_2	0.783857
b550	0.78396
n128_33	0.784332
ks259_6	0.78442
f32050_1	0.784546
f47790_1	0.784588
c113	0.784593
m44175_1	0.78462
l2_193	0.784626
ks113_1	0.784685
ks601_3	0.784764
opfblob0019	0.78486
d12635_24	0.784873
j120_11	0.784945
j461_7	0.784952
opfl0048	0.785157
n132_177	0.785191
b327	0.785342
d13568_1	0.78559
f18550_1	0.785693
f19199_1	0.785771
b468	0.785944
opfm60509	0.785963
m58024_1	0.786223
j373_1	0.78628
kn5905_5	0.786417
n128_41	0.786502
l2_17	0.786571
n148_9	0.786694
m16281_2	0.786739
ks783_1	0.786793
i1664_2	0.786833
l2_37	0.786844
m35930_5	0.786933
c646	0.787103
z_4_60	0.787186
b554	0.787231
b174	0.787301
m33512_2	0.787537
n141_50	0.787549
n145_22	0.787609
n128_25	0.787823
f11575_2	0.787847
m31208_2	0.788023
n134_83	0.788235
n132_119	0.788302
opff72489	0.788355
c234	0.788406
e679_5	0.788503
j2896_1	0.788568
l2_182	0.788582
m45177_6	0.788727
n140_21	0.78892
m3696_3	0.789032
j223_2	0.789097
a13725_7	0.789307
a31914_5	0.789319
n157_40	0.78946
i11857_3	0.789707
ks625_2	0.789721
i10630_1	0.789776
a3310_8	0.790194
n151_10	0.790247
j43_16	0.790521
d23156_33	0.790587
d17715_23	0.790841
f13414_1	0.790873
d63068_1	0.791209
a8010_30	0.791255
n141_3	0.791623
opfm60523	0.791847
b510	0.792084
f13223_1	0.792225
f33612_1	0.792274
f42112_4	0.792595
c101	0.792655
m25032_1	0.792672
m45468_2	0.793137
b498	0.793347
f67973_1	0.793492
j64_1	0.79386
c179	0.794028
n155_14	0.794754
l2_198	0.794768
f43397_1	0.794791
i8325_1	0.794811
m8686_1	0.794888
opfb0676	0.794921
m53181_1	0.794985
ks239_7	0.795203
f55601_1	0.795332
n185_5	0.795342
f37850_1	0.795369
i12816_1	0.795458
opfl0008	0.79594
f63812_1	0.796144
opfl0103	0.796185
opfm60527	0.796372
n136_13	0.796447
e263_4	0.796448
ks565_10	0.796544
opfh0038	0.796566
b567	0.797098
m26914_4	0.797184
d17715_125	0.797196
opfblob0173	0.797505
l2_140	0.79771
opfl0146	0.797751
kn4782_2	0.797913
f46705_1	0.798031
kn274_1	0.798056
b565	0.798238
opfl0071	0.798354
ks94_5	0.798422
opfh0008	0.798648
f43438_1	0.798702
e22930_2	0.798855
m24561_15	0.798924
ks732_4	0.799243
b513	0.799644
e5006_15	0.799846
m7883_6	0.799911
f52084_1	0.800172
ks115_6	0.800212
m7044_10	0.800294
kn2562_1	0.800647
z_2_100	0.800693
ks560_5	0.800885
e17649_1	0.800898
j12778_2	0.801081
e3185_6	0.801162
d33539_108	0.801465
kn4026_1	0.801528
f57064_2	0.801744
e30210_9	0.801756
ks466_1	0.801818
c115	0.801858
kn4926_1	0.801869
ks152_1	0.801905
ks212_4	0.801944
j870_2	0.801953
f55001_6	0.80234
e383_1	0.802452
d6287_54	0.802649
ks168_2	0.802735
z_7_50	0.802743
e8484_1	0.803109
n132_180	0.80312
m8032_4	0.803121
n135_6	0.803144
e23784_2	0.803233
n135_18	0.803376
f63949_1	0.803582
d17715_45	0.803586
kn3690_1	0.803636
f43935_4	0.803755
f8027_1	0.804015
n152_13	0.804041
n175_11	0.804517
j153_4	0.804528
i11342_1	0.804601
m29861_2	0.804664
d46820_1	0.804951
z_3_90	0.804972
i15927_1	0.804992
ks41_1	0.805192
e27723_3	0.805207
n142_4	0.805315
l2_153	0.805522
f2521_1	0.805597
f2600_1	0.805929
j181_4	0.80617
opfblob0119	0.806284
f53749_1	0.806294
f10318_1	0.80664
e17498_1	0.806647
f27351_1	0.80718
b325	0.807249
opfb0680	0.807406
opfblob0149	0.80753
j309_13	0.807575
l2_195	0.807844
ks625_7	0.807896
m6127_1	0.807957
b403	0.808138
j53_43	0.808541
n139_2	0.808612
f14029_1	0.808773
m22193_10	0.808934
m38941_3	0.80899
n137_14	0.809278
opfblob0117	0.809532
b431	0.809554
c283	0.809562
c439	0.809678
n157_41	0.809742
n140_5	0.809756
l2_114	0.809767
n127_3	0.809942
b481	0.809953
e19278_2	0.809971
m33579_3	0.810115
ks306_3	0.810426
d12635_31	0.810792
m21665_1	0.810945
i17587_1	0.811081
l1_85	0.811261
opff72439	0.811292
f16362_1	0.811604
i3555_2	0.811831
b60	0.811872
e18512_2	0.811896
e15509_13	0.812075
c688	0.81233
kn2174_1	0.812383
m49439_1	0.812561
m35930_3	0.81295
m38941_10	0.813001
b270	0.81303
ks51_11	0.813225
i15949_1	0.813296
m21954_1	0.813384
m26245_5	0.813437
n137_23	0.813538
ks624_2	0.813907
n150_52	0.813919
opfl0073	0.814356
a3310_6	0.814589
km1570_4	0.814681
c191	0.814732
n134_138	0.814936
opfk12908	0.814971
i3470_1	0.814995
opfm60479	0.815174
f19828_2	0.815552
opfl0142	0.816098
n127_44	0.816143
j248_7	0.816424
n134_101	0.816628
n134_82	0.816764
ks306_2	0.816976
d49176_36	0.816989
m25344_2	0.817006
a12696_3	0.817869
m49091_2	0.81793
e27173_1	0.817986
f61115_1	0.818037
f63161_1	0.81835
kn7692_2	0.818436
m5299_1	0.818475
a8010_4	0.818581
d17715_13	0.818807
e20424_2	0.818894
f13845_1	0.819146
f36637_1	0.819147
n128_71	0.819203
n157_11	0.819222
n138_95	0.819229
j53_16	0.819421
m59807_1	0.819902
b490	0.819945
n152_8	0.820013
kn3771_1	0.820027
m3928_2	0.820292
n138_24	0.820308
opfl0105	0.820309
b471	0.820409
j245_6	0.820475
d33539_64	0.820649
d6287_21	0.820699
d56327_1	0.820773
f71176_2	0.820854
n137_7	0.821421
ks818_2	0.821971
opfi17673	0.82211
d16785_26	0.822479
ks828_3	0.82249
z_4_100	0.822628
f19243_2	0.822639
c171	0.822794
a14195_4	0.822895
ks12_18	0.822986
a14801_7	0.823141
m26257_1	0.823332
n151_65	0.823381
ks1480_3	0.823411
e12152_1	0.823424
m196_8	0.824253
e25749_1	0.824382
ks81_2	0.824452
m22678_3	0.824469
f720_1	0.824494
n189_1	0.824669
e15509_5	0.824902
f26666_3	0.824996
opfm60531	0.825231
f52206_4	0.825425
n138_13	0.825432
opff72517	0.825637
j110_5	0.825716
i8674_2	0.825747
b540	0.825771
m43799_14	0.825813
m5894_7	0.825832
a3310_19	0.825954
i43_1	0.82599
m46791_1	0.826025
ks97_9	0.826049
j53_50	0.826183
f8511_1	0.82619
m21439_2	0.82621
j232_2	0.826236
kn1058_1	0.826262
i8129_1	0.826279
c344	0.826357
opfm60547	0.826562
a23157_14	0.826622
ks59_1	0.826733
e3038_1	0.826831
n138_48	0.827095
d4043_2	0.827572
l2_98	0.828145
i7697_1	0.828245
opff72482	0.828509
b558	0.82857
f53383_11	0.828681
f36374_1	0.828826
i12412_1	0.828897
f56229_4	0.829365
n159_34	0.829388
c258	0.829543
f14846_1	0.82974
e26771_3	0.829804
c630	0.830165
ks25_26	0.830213
n143_7	0.830272
j82_7	0.830445
m4842_1	0.830582
f16550_11	0.830601
a8109_12	0.830744
m37794_3	0.830943
ks1032_6	0.830953
i14747_2	0.831151
n140_25	0.83159
m45317_5	0.832045
opfl0096	0.832355
km2319_1	0.832551
j236_1	0.832854
n132_150	0.83295
kn2241_1	0.833262
opff72502	0.833271
f49071_1	0.833509
f53081_1	0.833637
n134_140	0.833639
m38247_1	0.833652
f25114_1	0.833713
opfn0271	0.83382
f7828_1	0.833833
f17612_1	0.833895
f71853_2	0.833903
e26598_3	0.833977
ks488_9	0.834115
c354	0.834254
opfi17645	0.834614
j120_15	0.834837
j58_2	0.834886
j379_2	0.834897
f47984_1	0.835021
ks624_8	0.835243
n132_194	0.835287
ks157_15	0.835809
d42243_39	0.835817
n132_142	0.836111
l2_248	0.836265
b576	0.83635
m38757_4	0.836379
m49680_3	0.836392
ks509_4	0.83647
opfl0064	0.836603
n135_27	0.836617
f20448_1	0.836631
opfn0270	0.836816
kn603_1	0.837066
i14729_1	0.837222
f32394_1	0.837494
n159_10	0.837831
i7097_2	0.838246
n155_25	0.838352
b444	0.838406
f24461_1	0.838497
j227_2	0.838836
f21150_1	0.839158
f3084_1	0.83929
kn1470_1	0.839339
opfblob0017	0.839585
m43799_9	0.839627
f22233_2	0.839955
ks66_16	0.839979
m6741_1	0.840108
opfblob0011	0.84021
c332	0.840275
n159_39	0.840312
d56259_1	0.84035
f5910_2	0.840607
i17174_3	0.840817
i10209_1	0.84094
opfg0001	0.84101
e26598_2	0.841165
f45048_3	0.841446
n132_37	0.841545
m40872_1	0.841557
d17715_138	0.841558
c625	0.841657
e24637_1	0.841729
n141_48	0.841878
i14956_1	0.842419
ks48_18	0.842511
n149_17	0.842512
f24726_1	0.842658
n132_181	0.84267
n137_5	0.84271
i4780_2	0.842764
b363	0.842834
j485_4	0.843076
f26408_1	0.8436
m36754_21	0.843734
c322	0.843918
c637	0.844083
f61469_1	0.844342
f49959_2	0.84438
n153_15	0.844618
z_3_70	0.84469
f33628_1	0.844826
m43418_3	0.844932
n132_60	0.845173
i578_5	0.845291
i6851_2	0.845418
m49010_1	0.845436
f26422_2	0.845528
opfblob0063	0.845615
opfblob0159	0.8458
m46462_5	0.845837
opfi17644	0.845897
m8609_1	0.845907
d6287_30	0.845937
j4379_1	0.845952
i7361_3	0.845962
opfg0019	0.846004
opff72483	0.846127
z_5_80	0.846442
opfl0051	0.846506
j69_1	0.846556
a8109_9	0.846638
d16785_38	0.84667
e11054_2	0.846766
kn226_1	0.846801
c584	0.846881
l2_70	0.847081
e29931_1	0.847088
j293_4	0.847394
n134_45	0.847463
opfj12808	0.847504
n138_82	0.847562
d17715_49	0.847575
j106_6	0.847613
m37744_1	0.847723
n136_4	0.847758
f1761_1	0.847796
opfblob0167	0.847803
ks56_17	0.848056
ks168_5	0.848097
i13674_3	0.848097
a8109_16	0.848403
n150_58	0.84846
j425_2	0.848471
opfh0024	0.848525
l2_267	0.848585
e26140_1	0.848904
opff72495	0.848963
opfl0101	0.8491
m22193_2	0.849291
opfg0052	0.849378
n128_20	0.849384
j64_3	0.849491
m58072_1	0.849709
i6567_1	0.849837
f57661_1	0.849848
n159_13	0.850037
opfl0153	0.850193
m32527_1	0.850345
d12635_37	0.850393
e13140_1	0.850443
n130_45	0.850472
ks155_1	0.850501
f10637_1	0.85055
i7404_1	0.850659
f10154_1	0.850673
kn934_2	0.850894
f8433_1	0.850961
m30810_1	0.85101
j34_4	0.851206
d17715_102	0.851291
i9166_1	0.851451
ks97_20	0.851558
m33579_2	0.851665
f53446_1	0.851758
opfc0764	0.85185
n132_122	0.8519
ks56_18	0.852164
j483_2	0.852284
kn701_1	0.85232
n132_171	0.852434
d33539_48	0.852526
n155_12	0.852533
l2_7	0.852574
m7770_2	0.852808
c169	0.852861
m23550_5	0.85291
m8199_1	0.852981
i4647_2	0.852994
m10432_1	0.853071
opfi17676	0.853159
ks309_3	0.853217
opfm60465	0.853391
c700	0.853403
j81_1	0.853437
j4848_2	0.853615
ks86_2	0.853917
f7632_3	0.853927
m37145_1	0.854222
e20147_1	0.854223
n243_1	0.854242
m50253_1	0.854617
j309_17	0.85462
f12330_1	0.854672
n134_114	0.854691
b342	0.854834
n155_19	0.854844
i3248_1	0.855199
ks828_1	0.855263
n137_44	0.855596
i12552_2	0.855653
opfm60485	0.855716
j147_3	0.855943
l1_47	0.856027
opfd66960	0.856103
i607_1	0.856293
d16785_36	0.856544
m8980_1	0.856698
j222_7	0.856753
m36754_18	0.856929
m29456_3	0.857022
n132_184	0.857196
ks168_6	0.8574
f27536_1	0.857542
ks664_35	0.857568
f41820_1	0.857591
z_3_50	0.857614
kn2144_2	0.85764
i10565_1	0.857735
m21439_1	0.857781
f2530_1	0.857969
opfn0267	0.857973
n158_6	0.857998
m54626_4	0.858049
c698	0.858094
km3703_3	0.858163
m33739_6	0.858377
e3612_2	0.858426
i16149_1	0.858455
b230	0.85861
opfm60554	0.858657
m21626_4	0.858682
j53_39	0.858733
m15018_1	0.858789
e18550_1	0.859395
opfn0256	0.859432
l2_147	0.859437
n159_46	0.859512
c163	0.859588
f45512_1	0.859601
n133_46	0.859775
opfblob0061	0.860143
ks56_33	0.860387
j73_15	0.86078
opfi17683	0.860867
n154_2	0.860876
l2_246	0.86091
e30210_1	0.860948
opfd66956	0.861001
ks72_9	0.86123
m14235_1	0.861244
a23157_18	0.861312
n141_14	0.861754
f20385_2	0.861773
f10724_1	0.861776
l1_49	0.861782
e8314_1	0.86191
d17715_142	0.861988
f50580_1	0.862095
c419	0.862315
kn1106_5	0.862389
opfc0774	0.862564
opfl0107	0.862804
e13599_1	0.862911
j478_5	0.862989
f4565_1	0.863124
j1024_1	0.863233
opfl0135	0.86331
ks225_7	0.863516
m56710_1	0.86383
ks349_9	0.864281
b366	0.86464
e23098_2	0.864714
e18169_1	0.864792
d64289_1	0.864837
n127_39	0.864975
f960_5	0.865027
i2689_1	0.865184
j163_8	0.865437
c116	0.865741
ks266_16	0.865783
ks26_17	0.865918
f24393_1	0.865985
c350	0.866007
f28782_1	0.866199
d17715_32	0.866215
b551	0.866486
n173_6	0.866537
n150_79	0.866576
ks2_9	0.866605
kn2400_1	0.866662
n134_120	0.86679
n135_23	0.866961
a23157_12	0.867219
n158_7	0.867278
f42072_1	0.867553
b466	0.867738
i5362_4	0.867988
n132_40	0.868044
n130_31	0.868237
f24125_1	0.868453
f33675_1	0.868825
b125	0.868985
d42243_42	0.868998
n141_36	0.869
opfblob0115	0.869051
b560	0.869191
i16949_1	0.869196
n136_14	0.86946
a8010_10	0.869654
m25771_1	0.869739
c180	0.870035
b218	0.870144
m4548_1	0.870166
l2_72	0.870181
j109_1	0.870215
ks244_9	0.870228
km993_1	0.870386
e18440_5	0.870398
m50721_4	0.870449
b177	0.870482
m1102_1	0.870662
d33539_61	0.870663
ks157_13	0.870698
i13124_2	0.870945
z_4_80	0.870958
m43418_8	0.871199
e9244_1	0.871331
e20360_12	0.871839
j170_10	0.87197
f42069_4	0.872037
f28313_1	0.872115
f23846_3	0.872117
b524	0.872153
f46067_1	0.872164
f37487_1	0.872524
n132_178	0.872711
f27679_3	0.873014
n153_8	0.873119
f62233_2	0.873237
ks112_3	0.873291
m32529_1	0.873322
f16210_1	0.873402
f68714_2	0.873475
n132_172	0.87351
n132_187	0.87356
opff72487	0.873572
l2_194	0.873722
ks83_15	0.873905
c497	0.874037
i14718_1	0.874183
m51089_1	0.874349
f66450_1	0.874368
c49	0.874624
kn12363_3	0.874722
c125	0.874749
d49176_20	0.875187
f21429_3	0.875265
e24677_1	0.875416
f62285_1	0.875437
opfd66954	0.875764
n168_6	0.875983
c337	0.87619
ks822_5	0.876347
b266	0.87636
d17715_20	0.876375
i8256_1	0.876377
d49176_1	0.876496
b120	0.876659
opfc0759	0.876674
ks559_1	0.876761
e8914_1	0.876854
kn9335_1	0.876956
opfblob0144	0.87703
d8125_1	0.877215
n132_115	0.877344
n159_42	0.877495
n147_21	0.877803
n141_60	0.877827
j110_3	0.877925
ks196_2	0.878044
n138_79	0.878094
f54097_1	0.878342
b172	0.878371
n132_113	0.878475
d12635_25	0.878558
f27464_2	0.878765
i6567_2	0.878785
f28897_1	0.878837
e9255_1	0.879327
m35008_2	0.879399
c649	0.879431
n132_157	0.879486
n150_27	0.879517
e21208_4	0.879612
m53642_4	0.879662
n175_14	0.879691
n147_14	0.879774
m38757_11	0.879785
f21902_6	0.879935
b496	0.879955
opfblob0035	0.880023
i8083_1	0.88024
n143_18	0.880406
z_5_100	0.880454
f58851_1	0.880585
f56229_2	0.880682
m38757_3	0.880895
opfi17667	0.881293
j239_5	0.881303
e23003_1	0.881444
c244	0.881446
m45542_5	0.881505
m49899_2	0.881543
j1901_1	0.881548
opff72453	0.881662
ks488_11	0.881795
f45296_2	0.881892
m3777_1	0.882292
ks25_5	0.882333
ks266_8	0.882388
n150_8	0.88299
j53_8	0.883136
e2926_1	0.883156
opfblob0125	0.883284
m6335_4	0.883555
d61496_1	0.883629
opfg0043	0.883839
c689	0.883845
n151_14	0.88395
f20102_1	0.884028
b241	0.884157
e26525_1	0.88438
f24356_1	0.884457
opfi17688	0.884465
j17_1	0.884554
kn1106_1	0.884683
f11232_1	0.884764
e15208_1	0.884766
ks76_5	0.884868
m7078_1	0.88502
opfl0133	0.885114
c641	0.885315
n171_3	0.885814
e20313_1	0.885834
j43_23	0.886352
m7883_5	0.886539
f48446_5	0.886925
i6653_2	0.887046
n151_9	0.88723
f45683_2	0.887267
ks624_4	0.887333
m51323_1	0.887388
m44397_1	0.887391
j191_1	0.887444
f53897_2	0.887472
ks510_6	0.887539
m7883_3	0.887581
b192	0.88761
ks711_8	0.887615
e18877_3	0.887926
opfblob0009	0.887994
m29079_3	0.888043
f2650_2	0.888105
n135_17	0.888166
b579	0.888249
b209	0.888684
n141_41	0.888726
m47080_1	0.888846
f36721_5	0.889045
d17715_47	0.889194
m57162_1	0.889223
j65_11	0.88927
kn201_14	0.889631
f69171_1	0.889727
m45918_3	0.88973
opff72427	0.889747
opfl0026	0.889913
l2_228	0.889931
m19188_2	0.890046
opfl0125	0.890327
opfn0247	0.890608
ks89_8	0.89064
d49176_6	0.890649
n138_34	0.890674
f32870_1	0.890839
ks625_14	0.89085
f29577_2	0.891039
f48424_2	0.891172
n181_21	0.891531
d42243_37	0.891601
n137_10	0.89172
n150_22	0.891921
i8781_1	0.891934
opfblob0178	0.892321
a8010_31	0.892375
f46816_2	0.89242
f38658_2	0.892678
i17505_1	0.892681
opff72499	0.892821
j33_2	0.893412
d33539_41	0.893435
j120_9	0.893518
m58298_3	0.893623
j71_11	0.893646
opfm60553	0.893917
m34743_1	0.894029
f55130_1	0.894252
n150_82	0.894525
m33579_1	0.894848
ks101_4	0.895179
a8408_2	0.895351
i15719_2	0.895358
km333_1	0.895567
d34948_3	0.895642
m36754_2	0.895674
m40872_4	0.895904
f64125_1	0.895999
m49637_1	0.896141
ks98_4	0.89619
z_5_90	0.896243
m45317_9	0.896288
n147_24	0.896387
f63677_2	0.896563
m34743_8	0.896679
f19320_4	0.896989
l2_270	0.897346
e5141_1	0.897381
opfblob0180	0.897442
c147	0.89745
ks79_2	0.897453
opfd67006	0.897572
m26914_8	0.897647
j246_2	0.897665
i12547_1	0.897776
e27723_15	0.897793
d15909_8	0.897811
d54346_3	0.89803
m18924_16	0.898146
m11377_1	0.898285
n159_31	0.898322
e15548_1	0.898442
ks68_12	0.898659
opfg0057	0.898805
i6724_2	0.899187
f18101_1	0.899196
f23940_2	0.899271
f19409_1	0.899611
e16122_5	0.899687
c137	0.899955
n135_7	0.900017
ks245_4	0.900361
m4927_3	0.900479
m4542_1	0.900518
opff72452	0.900534
ks142_1	0.900576
m53027_1	0.900685
e27300_2	0.900866
b215	0.900924
i17631_1	0.901064
d48327_1	0.901094
opfh0011	0.901184
opfl0160	0.901453
opfm60522	0.901518
b392	0.901695
opfl0015	0.901711
z_5_60	0.901739
opfl0147	0.901746
a3310_7	0.901779
d35152_1	0.901992
m39668_5	0.902083
ks1030_5	0.902234
opfm60507	0.90241
kn9479_1	0.90267
f54003_1	0.902714
n128_63	0.902737
j6_14	0.902854
l1_96	0.903127
ks370_2	0.903129
z_5_40	0.903277
m783_4	0.90361
i12708_1	0.903834
m19188_5	0.903977
f45524_1	0.903992
d6287_34	0.904355
n179_3	0.904515
opfh0025	0.90452
opfn0289	0.904524
l1_99	0.904591
ks155_2	0.904635
j53_26	0.904685
f34704_1	0.904706
f35105_1	0.904888
j58_3	0.905206
e5708_1	0.905247
i14381_1	0.905418
e4826_1	0.905633
c385	0.905676
j248_9	0.905791
n141_57	0.905852
m36754_9	0.906349
j162_1	0.906433
n141_47	0.906489
f15775_1	0.906545
opfi17719	0.906686
z_2_90	0.906728
f19549_1	0.906806
n127_32	0.906822
n128_66	0.906916
n134_123	0.907078
a21885_9	0.90721
a13725_5	0.907465
n150_89	0.907493
f38306_1	0.907517
f3302_4	0.907606
e29468_1	0.907713
f46513_1	0.907937
ks694_2	0.907956
opfg0026	0.908473
opff72461	0.908609
e29792_1	0.908876
j53_41	0.908973
n147_6	0.909125
e15509_4	0.909756
m17691_2	0.909773
c379	0.909935
b370	0.910042
n157_7	0.910148
opfn0262	0.910354
n132_173	0.910365
f28964_1	0.91038
f36356_2	0.910427
j125_8	0.910493
j163_6	0.910721
d6287_63	0.910777
ks2_11	0.91091
opfi17724	0.911043
n133_36	0.911118
i9764_1	0.911166
d6287_70	0.91118
e4249_1	0.911345
opff72420	0.911672
l2_44	0.911729
n137_43	0.912066
n159_4	0.912105
opff72456	0.912131
n149_22	0.912154
j478_4	0.912307
d16785_13	0.912324
kn4441_1	0.912359
c684	0.912478
f28758_1	0.912549
n163_1	0.912549
kn5414_1	0.912583
opfl0089	0.912733
m29456_12	0.912749
ks189_2	0.912834
n197_1	0.912848
j252_2	0.91302
d17715_132	0.91307
n138_52	0.91309
opfc0771	0.913407
m53752_1	0.913732
f5774_1	0.913843
j300_1	0.913907
n151_36	0.914076
n138_91	0.914261
d33539_56	0.914346
f48446_1	0.914419
f36383_1	0.914592
n138_38	0.914594
l3_22	0.914604
l1_42	0.91466
opfi17698	0.914819
m724_5	0.914983
n132_108	0.915017
n155_35	0.915158
f19746_5	0.915925
f7288_1	0.915969
b374	0.915982
j26_13	0.916079
opfd67004	0.916415
opff72494	0.91661
opfk12902	0.916622
j352_8	0.916931
ks83_17	0.917031
f11624_1	0.9175
ks83_18	0.917581
d17715_64	0.9177
b149	0.917903
opff72438	0.918085
l2_118	0.918102
e23345_3	0.918304
i14041_1	0.918304
b197	0.918524
l3_34	0.91868
i16837_2	0.919021
m29456_8	0.919108
m37499_1	0.919206
c416	0.919748
n149_15	0.919915
m24933_4	0.920165
n151_31	0.920281
e12916_3	0.9203
m37322_5	0.92042
b532	0.920561
i15423_1	0.920636
i7884_1	0.920781
f71520_1	0.921418
kn585_3	0.921496
n132_4	0.921579
j33_27	0.921668
n128_57	0.92173
opfl0028	0.921761
ks506_6	0.921775
a12312_15	0.921793
opfl0040	0.921814
j120_8	0.921816
ks3180_1	0.921867
f71182_1	0.921951
opfl0016	0.921978
j151_8	0.922046
ks545_1	0.922093
f23545_1	0.92212
j33_12	0.922136
n132_136	0.922214
f39343_3	0.92224
ks387_2	0.922299
e13302_3	0.922399
m36520_1	0.9225
f71224_1	0.922722
opfj12801	0.922847
j106_11	0.922858
j151_5	0.922885
m24561_16	0.923077
f11323_5	0.923121
kn2029_4	0.923184
f57076_1	0.923212
i1904_2	0.923299
opfd66993	0.923476
m8199_5	0.923481
m33739_2	0.923569
n150_91	0.923572
b322	0.923575
b389	0.923599
e29307_2	0.923929
opfblob0091	0.923931
ks488_5	0.924026
opfi17731	0.924371
opfl0140	0.924379
n143_35	0.924518
f7374_2	0.924545
b577	0.924739
opfblob0100	0.924793
f54854_1	0.924794
j6_4	0.925072
n130_60	0.925479
m18869_1	0.92568
n150_16	0.925715
m10202_2	0.925862
e29931_3	0.925864
f7915_1	0.925871
j170_19	0.926035
l3_9	0.926143
c563	0.926571
m5949_2	0.9266
a13231_2	0.926671
f20989_1	0.926796
j4689_1	0.926803
opfn0268	0.926909
e11202_1	0.927039
i9333_1	0.927133
m52423_1	0.927168
n151_35	0.927211
e6534_1	0.927386
c638	0.927486
m42736_1	0.927554
f4218_1	0.927696
m17181_1	0.927787
ks202_10	0.927817
n130_6	0.927867
d33539_33	0.928121
f68446_2	0.928159
d17715_112	0.92848
e13038_9	0.928866
opfblob0130	0.928964
m15943_1	0.929104
l3_3	0.929174
f62846_1	0.929213
f30728_1	0.92925
f36356_4	0.929908
n154_1	0.930157
m196_6	0.930363
m35930_6	0.930455
ks98_2	0.930482
n138_3	0.930723
n138_2	0.930731
m1962_1	0.930855
e19278_6	0.930894
l2_200	0.931062
opff72448	0.931125
opfblob0145	0.931151
i8674_1	0.931277
opfm60537	0.931593
i7697_2	0.931736
j21_24	0.931941
kn3773_1	0.932164
f68474_2	0.932185
kn588_2	0.932222
m38941_6	0.932697
n185_6	0.932857
n137_31	0.932935
f45342_1	0.933093
n145_9	0.933304
b475	0.933308
f10949_4	0.933381
opfn0251	0.933588
a1700_6	0.933647
n132_188	0.933707
m12812_7	0.933838
n128_53	0.933856
f4658_1	0.933913
f71755_1	0.933995
f12313_1	0.934341
c317	0.934713
j21_6	0.934764
f36083_1	0.934768
n132_27	0.93484
kn5587_1	0.934995
e16757_1	0.93508
m42658_1	0.935188
n151_52	0.935348
n134_139	0.935466
opfi17660	0.935708
c447	0.936109
c588	0.936232
n176_3	0.93624
ks694_7	0.936271
n148_11	0.936275
opff72440	0.936281
ks453_5	0.93655
km1367_2	0.936595
f17836_2	0.936621
n132_107	0.936628
j53_22	0.936648
l2_155	0.936728
m49509_6	0.936781
c686	0.936789
c183	0.936862
ks423_1	0.936906
d4043_3	0.936973
m4714_1	0.937137
opfm60551	0.937156
opfl0104	0.93718
j65_6	0.937253
ks379_5	0.937255
m45542_7	0.937515
n140_2	0.937666
f69867_2	0.937681
i5572_1	0.937846
j379_5	0.93817
d33539_32	0.938219
n130_52	0.93826
j5665_24	0.93832
ks225_2	0.938388
f39050_1	0.938413
f10953_1	0.938812
m14_1	0.938816
i1520_1	0.938922
c237	0.938998
m5455_6	0.939274
opff72425	0.939336
l2_123	0.939435
n141_34	0.939443
c681	0.939458
e15083_1	0.939504
opfl0127	0.939613
ks13_2	0.939718
j269_1	0.939934
ks239_6	0.939961
e15509_6	0.939989
ks349_12	0.940129
n150_78	0.940416
[truncated: 2,625 more rows]

## Sheet: average FC K1 Trophozite
Oligo ID	avg FC
b64	0.188021
m364_2	0.188611
e24991_1	0.233105
opfi17725	0.250906
opfl0080	0.252998
i15858_1	0.268919
opfn0248	0.27006
opfh0016	0.277412
m30262_1	0.278507
opfk12894	0.284571
opfi17704	0.291738
n165_15	0.292148
opff72462	0.302333
opfl0038	0.303848
m26214_1	0.309214
i10869_1	0.310915
e19248_5	0.312042
j564_3	0.312589
opff72472	0.313992
e16790_7	0.318708
e5006_5	0.325088
f35860_1	0.352847
f5951_1	0.35652
a31914_6	0.358763
opfg0048	0.361237
opfk12911	0.362092
opfl0159	0.370269
opff72442	0.379265
m26251_1	0.38479
n175_15	0.388612
m15786_2	0.395265
ks436_2	0.3982
ks565_1	0.402952
opfm60501	0.405275
m47001_2	0.406427
n134_73	0.407527
n127_57	0.420153
i3555_1	0.422711
f739_1	0.428036
j43_10	0.430673
i4394_2	0.430843
ks75_15	0.434176
d15909_2	0.436077
opfl0023	0.436392
b432	0.441451
n150_9	0.442207
n140_4	0.444984
e13140_2	0.446614
ks509_1	0.460227
l1_42	0.460796
j180_11	0.465161
c336	0.466457
ks1032_1	0.466859
f4481_1	0.468582
ks51_3	0.469622
m3696_2	0.472958
n165_14	0.47574
opfi17738	0.476017
e10967_2	0.476884
j2951_6	0.480189
opfl0013	0.481584
m46928_1	0.481829
ks157_18	0.487979
i14975_1	0.490427
ks595_1	0.493047
opfl0098	0.495671
opfl0022	0.496202
opfg0046	0.499594
i8811_1	0.504097
d52830_1	0.504172
i660_1	0.506073
opfk12907	0.506504
m35008_2	0.507082
kn8391_1	0.507269
b576	0.509537
m30813_1	0.515918
f41820_1	0.516801
e24075_1	0.517155
opfi17734	0.518594
opfh0008	0.51999
opfl0141	0.520741
c87	0.521466
opfh0037	0.521802
d12635_37	0.525987
j293_1	0.529521
f42937_1	0.531137
kn4298_1	0.533275
m26245_8	0.53414
opfl0108	0.535061
e20514_1	0.53589
opfblob0103	0.537134
j17_2	0.53762
f61115_1	0.53776
e886_1	0.538226
opfj12795	0.538982
i8675_1	0.53991
e3215_10	0.541306
l1_28	0.543577
opfi17696	0.54622
opfl0015	0.550537
m36754_18	0.551992
m16853_1	0.552689
opfm60512	0.553213
ks75_18	0.554198
j33_20	0.554723
j212_1	0.556286
f13307_1	0.556372
f16754_1	0.55738
ks624_8	0.557785
opfblob0015	0.558537
d17715_125	0.561889
opff72488	0.562727
j40_6	0.563352
f3492_1	0.564456
m30664_1	0.56553
opfm60477	0.567227
n130_44	0.567271
f11682_2	0.568252
n135_14	0.569077
ks1030_1	0.57078
j1011_2	0.571342
c541	0.575326
j248_7	0.576908
ks31_1	0.576968
m19791_1	0.577219
j181_9	0.578581
b568	0.580482
opff72498	0.580837
m41547_1	0.581413
m48963_5	0.58182
i3555_2	0.582604
m35930_9	0.58274
opff72446	0.583255
j120_17	0.583277
m10202_5	0.583749
n133_58	0.584374
m38757_7	0.585693
e11111_1	0.586075
m196_7	0.586836
e25193_1	0.586874
f30663_1	0.588416
e804_1	0.588437
opfm60536	0.589665
l2_131	0.589881
n138_89	0.590042
e6125_5	0.590218
m5804_3	0.594229
e15771_1	0.594747
f64732_1	0.594957
n134_141	0.595324
m42932_3	0.595413
i11448_5	0.59633
opfi17735	0.600369
kn603_2	0.601337
n128_76	0.601396
opfl0145	0.601555
opfl0131	0.603449
ks370_2	0.604365
m43116_3	0.605381
m42966_1	0.607289
n128_49	0.607671
f49644_2	0.607731
m42687_2	0.609513
e18550_2	0.610432
m32813_2	0.611209
opfi17681	0.611328
e28350_2	0.614498
j183_5	0.614623
i13569_1	0.615599
ks3365_1	0.615918
ks586_7	0.615942
opfi17708	0.618338
f59212_1	0.618882
i10790_1	0.619517
l2_247	0.620645
f52401_1	0.620753
z_6_90	0.620876
b530	0.620897
a18792_6	0.620959
f23916_1	0.621161
ks51_12	0.622137
i6658_2	0.622756
ks624_2	0.62414
opfb0680	0.626289
f38306_1	0.626717
opfi17680	0.627172
m35008_4	0.627771
n143_48	0.629309
kn656_1	0.629831
m26245_2	0.629844
b344	0.630635
f51945_2	0.63089
f45236_1	0.631835
z_4_100	0.632371
m5299_3	0.632881
e17649_1	0.63293
f54828_9	0.633255
b326	0.633477
opfc0758	0.634462
z_3_70	0.634726
ks48_18	0.635174
n137_30	0.635935
opfl0119	0.636879
ks54_4	0.637195
ks212_4	0.638762
c54	0.639753
m6508_1	0.639837
opfl0124	0.63995
f22946_1	0.640047
n134_113	0.640069
opfl0007	0.640995
opfg0049	0.64101
m45918_8	0.641551
f69158_1	0.641993
ks453_5	0.642416
opfl0111	0.642461
opfn0288	0.642577
c228	0.643458
ks370_4	0.643825
b88	0.644615
n127_3	0.644973
e84_1	0.646566
d16785_4	0.64711
l2_109	0.647924
f26666_3	0.648562
opfj12810	0.648705
a23157_12	0.649173
opff72484	0.649501
m58024_1	0.650604
f63632_3	0.650676
opfd67014	0.651151
b69	0.651157
n128_53	0.651315
j151_6	0.651513
d23156_27	0.651546
z_4_90	0.651672
j163_8	0.651717
d17715_138	0.65234
e13057_1	0.652449
c422	0.652844
e16790_10	0.652988
i11523_2	0.653375
n134_138	0.65343
f18101_1	0.653762
l2_62	0.654004
b383	0.654332
d17715_94	0.654515
opfl0113	0.654527
f42062_1	0.655502
opfj12801	0.655508
f66450_1	0.655638
n134_142	0.655722
f37098_2	0.655739
ks387_5	0.656542
m5299_2	0.656841
f14326_1	0.659242
kn5905_4	0.6594
opfblob0061	0.660035
f59139_2	0.660338
n149_12	0.660895
e263_7	0.660922
i16748_1	0.66131
m56256_2	0.661438
opfi17675	0.662041
d17715_104	0.662188
n172_3	0.662386
n157_12	0.662542
i8034_1	0.662645
opfn0289	0.662686
f45524_1	0.663297
m31639_1	0.66356
n138_13	0.663634
m60464_2	0.663797
i6567_2	0.663996
opfm60551	0.664477
f20870_2	0.664769
f9676_1	0.665127
opfl0160	0.665776
d17715_32	0.668533
f32325_1	0.669251
opfj12800	0.669403
ks56_32	0.669672
opfm60513	0.670186
f42564_1	0.670533
c123	0.670597
ks89_1	0.67099
opfd67000	0.672025
ks42_6	0.672219
n128_98	0.672248
m18539_2	0.672528
n244_2	0.673063
m17691_2	0.67311
ks382_1	0.673397
n166_3	0.673422
n132_115	0.674967
opfl0009	0.67594
ks97_1	0.676516
n134_44	0.677507
c470	0.678288
d49176_11	0.678558
opfi17694	0.679566
ks79_7	0.67982
f11323_5	0.679823
km548_1	0.679904
d33539_47	0.679924
opfm60479	0.679924
j2896_1	0.680947
n231_1	0.681634
i14670_5	0.681657
c147	0.681838
f53446_1	0.682218
f48395_1	0.682355
j71_11	0.682941
e26351_1	0.683039
f52120_1	0.683177
d17715_26	0.683418
f64125_1	0.68352
f57076_1	0.684927
c540	0.684957
c191	0.685286
z_4_60	0.685304
c259	0.685775
c277	0.685999
c439	0.686543
f42112_4	0.68672
n150_33	0.686994
m33579_2	0.687036
m40872_1	0.687099
f29467_4	0.687137
n158_4	0.687634
j4848_2	0.687777
j647_6	0.688008
j236_1	0.688131
n134_45	0.688135
i10869_2	0.68832
opfl0125	0.688344
e679_5	0.688394
f24511_1	0.688477
f67973_1	0.688719
d16785_8	0.689302
opfl0096	0.689561
l1_92	0.689759
kn820_1	0.689839
f35531_1	0.690029
opfl0146	0.690091
b540	0.690583
ks1480_3	0.690591
e14323_1	0.690615
opfg0055	0.690794
z_3_50	0.690804
n141_36	0.691002
e25972_1	0.691184
opfd66964	0.691401
n132_99	0.692094
e17521_1	0.692719
m22678_3	0.693244
z_7_80	0.693411
f13865_2	0.694802
m11064_1	0.694891
f16280_1	0.694925
d49942_10	0.695327
e15509_5	0.695362
m5455_7	0.69565
m49210_1	0.696049
opfl0092	0.696889
f57064_1	0.697026
f57777_2	0.697171
opfl0005	0.697318
n145_20	0.697391
e29307_2	0.698195
m8609_1	0.698396
j461_7	0.698547
f31053_2	0.698758
f72410_2	0.69876
j106_4	0.699023
m38757_4	0.699256
f10626_1	0.699944
m44300_14	0.69997
ks5580_5	0.699983
c145	0.700122
c249	0.700945
e5006_15	0.701368
j120_11	0.701393
c285	0.701577
b347	0.701605
opfblob0168	0.701829
opfl0010	0.701926
e2283_4	0.702588
n133_46	0.702774
n132_180	0.702887
f46705_1	0.703367
n136_6	0.703965
ks1072_1	0.70442
c380	0.705301
n138_82	0.705383
opfblob0012	0.705424
b362	0.705816
ks259_7	0.706025
f25456_1	0.706155
m26914_4	0.706371
d13582_1	0.706561
n127_44	0.706733
opfi17730	0.707434
f19549_1	0.707972
f30796_1	0.708314
opfl0008	0.708546
j373_1	0.708655
b303	0.709138
opfc0770	0.709659
ks51_6	0.70968
m38113_2	0.710321
m1886_1	0.710619
f69867_2	0.711074
ks5_1	0.711632
b527	0.711738
f53897_1	0.711901
e15509_6	0.71191
m29567_1	0.712114
i8305_1	0.712126
d12635_39	0.712283
m33088_2	0.712711
kn6869_1	0.712858
ks624_4	0.712993
f46067_4	0.713459
e11286_1	0.713768
d33539_15	0.713783
f13784_1	0.713948
n157_1	0.714199
m45177_10	0.714709
d6287_38	0.715171
kn603_1	0.7152
z_3_60	0.716449
i6032_2	0.716787
l2_117	0.716828
e19631_3	0.716935
opfk12891	0.717925
b468	0.717966
e18169_1	0.718075
d33539_16	0.718124
j227_6	0.718224
ks423_1	0.718328
i17263_1	0.718379
e23098_1	0.718459
n134_51	0.718598
m34743_8	0.718877
z_2_80	0.719454
c676	0.719872
e4159_1	0.720141
opfl0114	0.72049
e24637_1	0.720859
m57162_1	0.720922
j116_2	0.721124
ks26_12	0.721231
z_4_80	0.721239
f12867_3	0.721444
ks8267_1	0.721529
ks510_13	0.722028
j33_16	0.722092
m16281_2	0.722442
i1291_1	0.722815
ks155_1	0.722908
ks83_1	0.722926
i17100_1	0.724651
b521	0.724999
f59453_1	0.725157
d54346_3	0.725272
j110_1	0.725538
f46067_3	0.725588
i12412_1	0.725751
i8447_1	0.725976
n165_16	0.726179
l1_96	0.726397
j109_2	0.727088
n138_31	0.727258
m42506_1	0.727589
b489	0.727799
f66665_1	0.727938
j73_4	0.728207
m35930_8	0.728416
kn3360_5	0.728993
f45342_2	0.730041
ks559_1	0.730161
e22930_2	0.730499
n132_118	0.730537
ks26_5	0.730792
d15909_5	0.73087
n134_78	0.730921
f46320_2	0.731271
j53_26	0.731492
i6567_1	0.731841
opfl0127	0.732028
l2_195	0.732111
f4380_1	0.73275
n185_7	0.733286
n132_171	0.733415
n132_60	0.733662
n127_7	0.733718
m24933_5	0.733779
f8433_1	0.733926
j26_9	0.734056
opfblob0132	0.734115
z_4_50	0.734137
m35930_5	0.734148
opfblob0130	0.734242
j106_6	0.73435
n130_21	0.734807
b60	0.734927
f18417_1	0.735464
kn226_1	0.736036
f67874_1	0.736436
e27461_1	0.736538
f17275_1	0.736702
l3_38	0.736973
m36754_21	0.737106
m26245_3	0.737459
f57713_2	0.737553
e19278_6	0.737696
m48367_1	0.737782
f21150_1	0.738202
d33539_48	0.738311
b496	0.738649
kn459_3	0.738835
f11743_1	0.738893
ks244_7	0.739181
j504_5	0.739355
ks5580_2	0.739359
m45727_7	0.739635
b550	0.739737
j293_4	0.739823
f10872_1	0.739854
i8013_1	0.740563
d33539_17	0.740959
b77	0.741092
a23157_14	0.741278
ks76_3	0.741303
e248_3	0.741333
opfl0105	0.741483
m18924_1	0.741602
ks266_15	0.741713
f7809_2	0.742233
m43418_3	0.74229
n134_61	0.742328
b112	0.742429
z_3_80	0.742499
d23156_40	0.742544
d12635_25	0.742744
b405	0.742832
m2931_1	0.742968
opfi17636	0.742985
f53854_2	0.743173
z_7_60	0.743225
ks1_2	0.743426
kn3709_1	0.744149
f8511_1	0.744241
kn209_1	0.744401
ks25_5	0.744511
z_2_50	0.745078
i15363_1	0.745139
kn4026_1	0.745393
opfm60523	0.745881
m43799_14	0.746416
b481	0.746452
e8769_2	0.746562
b178	0.746872
f21429_3	0.746988
opfi17715	0.747307
e10705_1	0.747475
i5974_1	0.747636
j53_43	0.747749
f42069_4	0.748096
opfl0132	0.748289
f49644_4	0.748448
c441	0.748508
a31914_5	0.748682
m37794_3	0.748818
opff72461	0.748853
opfi17661	0.749127
f71130_3	0.749278
kn2144_2	0.749525
opfm60483	0.749788
f20224_1	0.750044
d63068_1	0.750063
f53749_1	0.750096
m34107_3	0.750292
opfi17718	0.750389
ks56_24	0.750509
opfl0087	0.750653
n150_53	0.751164
n151_65	0.751234
m5299_1	0.751375
m2157_1	0.751413
i4355_3	0.751502
opff72487	0.751539
m53181_1	0.752061
kn5587_1	0.752204
f5774_1	0.752679
opfl0116	0.752877
n243_1	0.752999
a12312_15	0.753882
i17587_1	0.753909
l1_97	0.753948
m45177_20	0.754322
m15752_5	0.754921
b593	0.755471
b567	0.755663
b70	0.756041
b491	0.756195
n128_63	0.756455
i15927_1	0.756613
i13124_2	0.756687
i12057_1	0.757734
opfg0026	0.757953
f42543_3	0.75809
ks509_4	0.758206
j425_2	0.758342
m35930_3	0.758397
f13671_1	0.758829
l3_3	0.758901
ks15_3	0.759088
n141_8	0.759416
d33539_31	0.759547
kn2725_1	0.759554
e27723_10	0.759904
ks89_2	0.75999
e13462_3	0.760572
m8686_5	0.760679
ks244_9	0.760733
f59165_1	0.76083
f13223_1	0.760945
c370	0.760962
opfi17671	0.761039
a14801_13	0.761041
f713_1	0.761303
ks98_7	0.761402
m6612_2	0.7617
f21429_1	0.761716
f32050_1	0.761866
e263_4	0.761913
e15790_1	0.762163
n149_4	0.76221
f69171_1	0.762269
ks506_6	0.762609
opfl0091	0.762612
j33_3	0.762773
m49138_2	0.762917
e13038_9	0.763142
n128_74	0.763245
j938_1	0.763412
f2521_1	0.763757
ks225_7	0.763949
d7726_1	0.764133
d55287_1	0.764182
opfblob0143	0.764291
m49138_1	0.764578
j267_2	0.765166
f71130_4	0.765245
b180	0.765249
f51552_2	0.765304
e3552_1	0.765554
i16326_1	0.765698
f960_1	0.765794
e8484_1	0.766052
l2_12	0.766417
f4495_1	0.766516
opfn0277	0.766559
e16122_5	0.766898
n127_29	0.767148
i1974_1	0.767319
i11161_1	0.767422
d34948_3	0.767597
e20313_1	0.767898
opfm60553	0.76832
n155_12	0.768389
n150_52	0.768418
f5910_2	0.76849
opfl0153	0.768642
opfb0671	0.76927
m57443_3	0.769846
j22_2	0.769861
e15452_2	0.769969
n159_13	0.770048
opfl0082	0.770173
m45918_3	0.770405
opfblob0058	0.770414
m42932_1	0.770646
f960_7	0.770848
m12359_1	0.771603
b366	0.771613
e1884_3	0.771969
m48629_1	0.771979
f37487_1	0.772098
i1033_3	0.772163
n139_31	0.77234
n143_35	0.772434
i14195_1	0.772451
opfl0147	0.772528
e22930_3	0.772678
b565	0.77271
n134_29	0.772775
f16449_1	0.772978
f20385_3	0.773054
f36374_1	0.773124
m35892_3	0.773348
e24677_1	0.773673
ks838_1	0.773844
e21208_4	0.774214
f56806_1	0.774602
m56710_1	0.774991
i6740_1	0.775307
ks13_2	0.775553
n141_48	0.775944
f64125_2	0.776287
c600	0.776471
j170_19	0.776573
c242	0.776736
n136_7	0.776846
f11232_1	0.777112
d4043_3	0.777189
c447	0.77735
kn1626_2	0.777477
b511	0.777664
i8674_2	0.777893
a12797_1	0.778004
e12266_2	0.778099
e714_14	0.778458
i6851_1	0.778919
m3675_2	0.778939
f39343_3	0.779139
n132_133	0.779206
n132_1	0.779304
e30210_9	0.779406
c85	0.780054
n132_27	0.780257
n159_23	0.780403
opff72420	0.780405
f57982_1	0.780546
opfm60470	0.780686
ks98_4	0.781567
m31208_5	0.781653
opfm60537	0.781767
n159_38	0.781779
b587	0.781964
n134_66	0.782345
a8010_16	0.782465
f57777_1	0.782468
f68156_1	0.782595
f24461_1	0.782625
l2_44	0.782899
opfblob0007	0.782939
n187_5	0.783026
n132_172	0.783708
c344	0.783811
z_7_70	0.783844
b403	0.78387
km993_1	0.784165
n132_127	0.784293
j151_5	0.784303
f36356_6	0.784594
l1_43	0.784703
opff72482	0.784763
ks76_9	0.784815
j53_42	0.784866
opfc0759	0.784999
n159_40	0.785127
m22193_2	0.785485
e18984_1	0.785602
m1042_1	0.78591
n127_54	0.785911
l2_154	0.785923
f26422_1	0.78594
e18440_5	0.786156
c688	0.7862
ks510_3	0.78639
opfblob0145	0.786532
n137_5	0.786644
f5252_1	0.786672
kn945_3	0.786741
opff72489	0.786875
j183_4	0.786912
j1010_1	0.787047
e29931_3	0.787141
f17508_1	0.787387
n137_44	0.787898
i9338_1	0.788067
j45_11	0.788156
m7883_3	0.788559
l2_193	0.788665
m41041_1	0.788878
n159_39	0.789003
b541	0.789486
opfl0126	0.789644
d33539_96	0.789781
n157_4	0.790027
ks8_1	0.790034
f45556_3	0.790157
ks783_1	0.790208
n130_45	0.790435
d17715_37	0.790468
n173_5	0.790631
m49010_1	0.791099
ks76_5	0.791215
m35935_2	0.791357
e18550_1	0.791629
a31914_2	0.791945
n134_1	0.79209
opfl0122	0.792539
f47864_3	0.792746
f45048_3	0.792749
j147_3	0.792795
opfg0035	0.792805
i16949_1	0.7929
f45432_1	0.793053
opff72491	0.793083
i43_1	0.793187
opff72460	0.793737
ks117_1	0.793744
f10637_1	0.793818
ks545_4	0.793867
ks98_5	0.794019
kn2029_4	0.794045
opfd66975	0.794201
c387	0.794213
d49176_39	0.794226
f56229_2	0.794412
n151_31	0.794449
d4043_2	0.794469
f31855_1	0.794723
l2_17	0.794944
opff72459	0.795138
f51805_1	0.795267
j110_5	0.795271
m51089_1	0.795331
m21368_1	0.795332
f34425_1	0.79537
d6287_54	0.795873
opfblob0124	0.795883
kn274_1	0.795991
m37080_3	0.796047
l2_182	0.796062
c538	0.796117
kn5587_2	0.796121
m38757_3	0.796438
f33628_1	0.796475
ks168_5	0.796916
b225	0.797092
i4547_1	0.797218
opff72452	0.797391
n134_119	0.797523
n149_2	0.797853
d17715_15	0.798057
f1153_1	0.798119
j53_28	0.798133
n132_97	0.798243
n134_30	0.798317
f62610_5	0.79859
kn3380_2	0.798835
opfl0089	0.799018
d6287_29	0.799468
m38757_6	0.799533
j870_2	0.799573
a14195_4	0.799736
d65681_1	0.799799
f25464_1	0.799811
d12635_45	0.799821
d1479_1	0.799986
f71594_1	0.800195
opfk12896	0.800371
i2533_1	0.800383
n149_30	0.800753
c472	0.800978
e15083_1	0.801238
f2530_1	0.80126
n132_162	0.801429
n155_25	0.80157
f17612_1	0.801589
opfblob0111	0.801727
i4989_1	0.801853
ks97_2	0.802007
opfd67001	0.802028
e1197_2	0.802036
a14801_9	0.802153
f13746_1	0.802195
n132_125	0.802229
n149_17	0.80226
opfh0028	0.802325
opfl0135	0.802395
m2610_1	0.802434
d49942_6	0.802802
n157_11	0.802967
m43799_6	0.803309
kn672_1	0.80335
opfm60486	0.803502
ks25_26	0.803859
d16785_36	0.804082
j73_14	0.804262
ks89_3	0.804336
opfg0007	0.804479
n132_106	0.804596
m18376_1	0.804956
i4582_1	0.804987
ks533_1	0.80544
f29767_2	0.805651
f64738_4	0.806116
f62396_2	0.806122
b218	0.806128
f1021_1	0.806376
ks488_9	0.806379
f43438_1	0.806494
i5362_4	0.806521
j181_4	0.806633
m5968_1	0.806712
b93	0.807194
m21508_6	0.807235
f69951_1	0.807291
km389_2	0.807326
m31208_15	0.807616
kn3773_1	0.807756
j106_9	0.807927
n141_3	0.80794
f70676_1	0.808354
j62_1	0.808688
z_3_90	0.808788
c559	0.809291
f55130_1	0.809299
opfm60509	0.809657
ks173_8	0.809823
n134_47	0.809994
ks510_6	0.810161
j318_2	0.81018
d6287_31	0.81023
c614	0.810368
n151_9	0.810607
f27679_4	0.810704
f4501_1	0.8109
ks51_9	0.811312
f55601_1	0.811329
kn1115_2	0.811582
c624	0.811785
e26525_2	0.81186
c283	0.811966
f24356_1	0.812296
e17330_2	0.812433
i16689_1	0.812615
m45177_6	0.812633
e4099_5	0.812813
f24726_1	0.812894
m446_3	0.812988
ks8_2	0.813154
f71520_1	0.813301
n128_11	0.813885
f48433_1	0.81396
d17715_81	0.813974
ks12_6	0.814304
f68634_3	0.814423
ks239_6	0.814509
d33539_56	0.814665
f1021_4	0.814696
kn8017_1	0.814766
j309_17	0.814823
m34743_6	0.814856
f21003_1	0.814915
d17715_140	0.815023
f11575_2	0.81522
a1700_6	0.815564
i15927_6	0.815849
i3248_1	0.816005
d49176_7	0.816049
ks183_1	0.816175
m50721_5	0.81636
opfc0764	0.816411
e13220_3	0.816756
f52907_2	0.816802
m8199_3	0.81686
ks2_1	0.817076
opfg0036	0.817379
f2600_1	0.817732
f4732_2	0.817933
ks25_19	0.817935
ks17_15	0.818119
d3593_1	0.818235
j53_21	0.818454
opfj12816	0.818486
kn1047_2	0.81861
i6653_2	0.818711
f18550_1	0.818886
b174	0.819065
j116_9	0.819067
ks259_1	0.819515
i14413_3	0.819547
km3516_4	0.819597
f54097_1	0.819675
d10917_2	0.819714
m17181_1	0.819936
n138_26	0.820088
f7828_1	0.820188
i6724_2	0.820298
opfl0057	0.820793
i2966_2	0.820901
f59084_1	0.820968
kn3190_1	0.82136
n140_6	0.821364
m36754_2	0.821586
kn2008_4	0.8221
e9164_1	0.822316
opff72513	0.822434
n128_90	0.8225
e26598_2	0.822522
opfblob0182	0.823049
c686	0.82321
n155_21	0.823263
f19320_4	0.823405
b588	0.824028
f65043_4	0.824082
b437	0.824152
n143_18	0.824306
opfblob0117	0.824483
ks309_3	0.824674
f52084_1	0.824807
b266	0.825213
l2_265	0.825267
d13568_1	0.825284
i607_1	0.825635
opfj12794	0.825677
n175_6	0.825733
ks56_17	0.825752
f47984_1	0.825953
i12816_1	0.826017
c258	0.826057
m1840_2	0.826132
m7883_7	0.826362
e20147_1	0.826413
m50721_4	0.826516
m24561_15	0.826619
l2_55	0.826978
opfm60467	0.827227
j190_1	0.827283
m12812_5	0.827566
f16210_1	0.827632
m4230_1	0.82765
m53027_1	0.827704
j22_4	0.827736
m43799_2	0.82791
i8083_1	0.827931
n137_4	0.828008
j43_3	0.828031
n175_10	0.828214
n134_123	0.828217
f56837_1	0.828362
m3465_1	0.828444
n159_30	0.828685
i2689_1	0.82871
j17_1	0.828711
i15949_1	0.828853
z_7_90	0.829023
n134_32	0.829266
n147_21	0.829335
d13568_2	0.829381
n151_36	0.829409
m58847_3	0.829488
j104_1	0.829648
i15461_2	0.829804
e15509_13	0.829965
opfm60516	0.829973
n157_40	0.830074
n132_52	0.830161
kn2174_1	0.830228
i1568_2	0.830342
m7985_1	0.830791
opfm60518	0.831134
j21_1	0.831247
c152	0.831275
n155_7	0.83144
c637	0.831487
f26408_1	0.831497
f53897_2	0.831528
d17715_67	0.831562
f16681_1	0.831772
d56327_1	0.831794
n151_10	0.83186
f43064_2	0.831997
f3084_1	0.832215
l2_246	0.832219
d12635_21	0.832279
n138_34	0.83233
opff72492	0.832428
opfl0026	0.832484
j425_3	0.832685
m1222_1	0.832827
i11448_2	0.832876
m33512_1	0.832899
ks446_1	0.833035
i15870_1	0.833161
m7078_1	0.833165
d15909_4	0.833659
ks732_4	0.833815
n128_32	0.83385
m47319_1	0.834381
l2_155	0.834709
ks977_2	0.834722
f960_4	0.835018
n159_56	0.835069
n132_109	0.835206
e27300_2	0.835207
l2_196	0.835237
n135_6	0.835966
j163_7	0.836076
i16487_2	0.836101
m46791_4	0.836222
i1431_1	0.836291
ks107_2	0.8363
l2_149	0.836364
f47068_6	0.836427
j33_15	0.836562
d42243_42	0.836632
ks91_4	0.836772
i13369_2	0.836885
e20424_2	0.837161
m26739_1	0.837217
n138_45	0.837219
f48138_1	0.837281
f19409_1	0.837829
n128_20	0.837943
f49857_1	0.838056
n143_57	0.838158
c240	0.838319
c630	0.838376
m41763_2	0.83854
m58927_1	0.838795
c96	0.838804
ks202_10	0.838966
m37145_2	0.839112
n134_114	0.839301
m60243_1	0.839349
c699	0.83955
n181_15	0.839687
j163_6	0.839712
n155_14	0.839992
b197	0.840201
d42243_39	0.840837
f43935_4	0.840944
l3_6	0.840987
ks98_2	0.841086
e7418_1	0.841095
opfblob0082	0.841521
n132_15	0.841591
e13599_1	0.841628
c419	0.841917
ks117_6	0.842137
f19110_2	0.842172
f64347_2	0.842354
kn3081_1	0.842385
opfm60490	0.842599
j53_16	0.84283
j73_15	0.842955
n135_18	0.843223
d33539_28	0.843301
m35935_1	0.843364
n140_2	0.843487
m15943_1	0.843617
m18924_9	0.843806
i879_1	0.843925
m52144_1	0.844038
n185_14	0.844084
a10325_29	0.844089
m4364_1	0.84431
f55001_6	0.844584
ks86_2	0.845279
m6522_4	0.845353
kn872_1	0.845544
f5429_1	0.845631
ks98_3	0.845802
ks189_2	0.84585
c174	0.846043
n152_5	0.84613
n128_23	0.846185
m33739_5	0.84639
opfblob0065	0.846543
j33_12	0.846587
e9299_6	0.846599
n138_70	0.84673
j21_15	0.846903
j191_1	0.846937
f33675_1	0.847007
f34605_1	0.847028
f58851_1	0.847084
f16951_1	0.847836
l2_166	0.847924
opfi17635	0.847927
n137_31	0.848136
j252_2	0.848177
m8032_1	0.84827
c253	0.848291
c578	0.848358
f42308_1	0.848511
j649_1	0.848635
kn6804_2	0.848638
l2_7	0.84879
opfblob0180	0.84879
opfd67016	0.848865
n173_1	0.848949
b543	0.849054
kn768_1	0.849128
f49644_5	0.84936
m20060_1	0.849363
f13414_1	0.849516
i7361_3	0.849531
e30064_1	0.849887
e15548_1	0.85012
opfl0060	0.850297
a14195_3	0.850305
m724_5	0.850356
f68282_1	0.850404
ks112_3	0.850478
opfd66961	0.850565
f32922_1	0.850592
kn2241_1	0.8509
f49959_2	0.851722
n143_36	0.851816
j478_4	0.851816
f15775_1	0.851896
b192	0.851918
opfl0029	0.852029
i6724_1	0.852279
i6658_1	0.852675
a21885_9	0.852954
j206_1	0.853
n147_24	0.853137
c73	0.85319
ks316_17	0.853263
b91	0.853884
m44397_6	0.854079
m4842_1	0.854327
i10565_1	0.854388
kn11437_2	0.85474
f71224_1	0.85491
opfi17731	0.855099
n141_47	0.855107
d49176_44	0.855244
j153_4	0.85544
m38757_11	0.855961
f57388_1	0.856181
c180	0.856272
i622_1	0.856281
c97	0.856351
l2_63	0.856357
m44397_1	0.856474
opfn0278	0.856572
i9333_1	0.856596
m38247_1	0.856827
b461	0.856972
z_7_50	0.857001
n175_8	0.857244
f21821_2	0.857763
e10857_1	0.857976
e679_2	0.858088
i15363_2	0.858225
n179_3	0.858799
a14801_2	0.859219
opfblob0035	0.859225
opfm60525	0.859312
i14041_1	0.859534
opfl0104	0.859593
m5455_3	0.859812
i17505_1	0.859891
opfk12915	0.860242
b551	0.860332
m22193_10	0.860362
opfd66958	0.860497
f33441_1	0.860635
c116	0.860652
ks565_10	0.860733
b327	0.860779
m2511_2	0.860852
n130_6	0.860957
c646	0.861104
b270	0.861338
a3310_8	0.861377
e22468_1	0.861569
opfj12802	0.861613
i11857_2	0.861758
ks259_6	0.861826
m23823_3	0.861837
i14718_1	0.86188
m14_1	0.861957
e679_1	0.862055
m55949_1	0.862197
m49680_3	0.862338
n151_19	0.862353
opfi17711	0.862353
kn4524_1	0.862437
j147_2	0.86265
n137_25	0.862759
opff72443	0.862954
opfl0040	0.863078
n159_42	0.863211
j53_41	0.863302
d49176_6	0.863475
j120_2	0.863542
i9876_1	0.863594
z_3_100	0.86377
m2610_3	0.86379
i15505_1	0.863903
f39877_1	0.864025
c146	0.864048
n189_5	0.864232
z_4_70	0.864616
f57388_2	0.864884
ks157_2	0.864944
opfd67015	0.864966
n140_25	0.864967
m25771_1	0.864985
opfblob0014	0.865333
opfh0024	0.865344
n151_64	0.865468
c171	0.865561
f38658_2	0.865824
opfl0074	0.865895
f48424_2	0.866144
l2_180	0.86624
n130_39	0.866256
m23550_1	0.866433
f10044_1	0.866439
opfblob0020	0.866441
m10202_2	0.866463
f34704_1	0.866482
d17715_20	0.866485
i8325_1	0.866559
l2_70	0.866685
f45354_1	0.866714
opfm60465	0.866801
i12547_1	0.866808
j512_2	0.866808
opfl0045	0.866824
n137_45	0.866881
i1520_1	0.866904
m3590_1	0.867341
f19190_1	0.867341
d42243_37	0.867527
f22635_2	0.867613
opfl0051	0.867633
a13725_5	0.867682
d17715_132	0.867819
j1588_1	0.868366
f35197_1	0.868403
d17715_8	0.868468
e12876_2	0.868476
i11584_1	0.868497
e8100_4	0.868752
i2739_1	0.869237
opfi17660	0.869304
opff72415	0.869331
opfblob0010	0.869396
ks81_2	0.869448
b557	0.869511
b117	0.869549
f4675_1	0.869624
e4295_1	0.869753
d4722_1	0.869836
f69174_1	0.869867
m24561_3	0.869917
n159_31	0.870048
f45048_2	0.870294
e19278_2	0.870374
kn862_1	0.870477
n137_43	0.87058
f28782_1	0.870631
m7883_6	0.870633
j64_1	0.870728
i4989_2	0.87076
f62141_1	0.870875
opfg0019	0.870943
j33_11	0.871166
ks625_2	0.871195
m37145_3	0.87127
m37145_1	0.871328
f3664_1	0.871543
opfa32033	0.871856
ks466_1	0.871889
e15509_4	0.871925
j8570_1	0.871997
opfblob0178	0.872209
n128_85	0.872281
b490	0.87231
n153_7	0.872363
f64735_2	0.872374
e26577_1	0.872375
f45512_1	0.872479
opff72426	0.872544
j125_8	0.87267
d33539_95	0.872837
e13140_1	0.872867
f5206_9	0.872883
e25749_1	0.872896
d49176_31	0.87293
n134_101	0.873138
kn479_3	0.873155
d49176_20	0.873466
i2631_1	0.873526
i17314_1	0.873805
m19188_2	0.873932
e19248_7	0.873973
j33_2	0.87399
opfg0025	0.874265
f3410_1	0.874475
f6077_1	0.874662
ks157_14	0.874706
e23098_2	0.874859
n127_18	0.874928
c169	0.874966
opfg0057	0.875071
f4422_3	0.875114
m36520_1	0.875225
a3310_7	0.875258
b388	0.875381
ks135_4	0.875383
m17275_1	0.875384
f57064_2	0.875527
ks13_4	0.875907
n145_9	0.875911
m49091_1	0.876043
f68157_1	0.876277
d16785_3	0.876427
f24156_1	0.876593
d61496_1	0.87673
opfn0267	0.87679
n143_53	0.876871
d33539_109	0.877091
opfm60538	0.877173
f11801_1	0.877206
m38190_1	0.877391
z_2_100	0.877425
n143_55	0.877449
j27_14	0.877537
opfl0117	0.877975
e26525_1	0.878077
f23564_1	0.878377
ks1032_5	0.878431
opfm60468	0.878489
n133_43	0.878496
kn4441_1	0.878525
e524_4	0.878877
j223_2	0.878893
f60188_2	0.879066
f18577_4	0.87912
n181_17	0.879138
f27464_2	0.879329
i12552_2	0.879371
m47080_1	0.879392
m35930_10	0.879515
l2_194	0.879535
i1664_2	0.879752
f37850_1	0.879957
ks64_1	0.880027
ks349_9	0.880083
d17715_17	0.880186
j299_1	0.880204
kn67_1	0.880347
opfl0102	0.880514
opfi17637	0.880618
f23940_2	0.880625
j170_18	0.880651
f24125_1	0.880714
opfi17726	0.88085
l2_150	0.880903
c129	0.880927
b120	0.880932
l1_31	0.881133
m8047_1	0.881215
i15544_1	0.881446
a22429_1	0.88145
d12635_1	0.881613
d16785_17	0.881813
f71096_1	0.882137
ks545_1	0.882189
n135_20	0.88225
i4780_2	0.882306
j53_37	0.88234
opfn0262	0.882592
ks168_2	0.882635
b171	0.882745
f28964_1	0.882829
ks625_14	0.88307
ks1030_4	0.883106
f27679_3	0.883223
n168_17	0.883568
i14201_1	0.883593
ks306_2	0.88376
opfm60495	0.883777
f7809_6	0.883784
d17715_11	0.883793
n150_10	0.88398
m53752_1	0.884135
d17715_95	0.884145
f24631_1	0.884347
opfblob0092	0.884352
f19243_2	0.884354
n148_12	0.884418
a6420_1	0.884508
f51756_1	0.884562
b230	0.884771
f63812_1	0.884812
ks266_8	0.885042
i17421_1	0.885129
opfc0754	0.885151
kn1132_1	0.885271
m40872_4	0.885292
n175_2	0.88531
opfl0144	0.885333
b209	0.885561
f13529_1	0.885756
m5455_1	0.885802
opfi17645	0.886277
ks59_1	0.886312
m4548_1	0.88663
n185_6	0.887015
f22770_1	0.88732
f16550_11	0.887322
d33539_61	0.887675
b498	0.88775
n143_44	0.887839
n153_1	0.888087
ks101_8	0.888242
i1215_1	0.888342
n132_150	0.888391
f20989_1	0.888589
opfj12792	0.888767
i4500_1	0.889294
f35774_1	0.889313
ks56_18	0.889395
j564_2	0.889907
l2_280	0.889927
ks44_10	0.88994
kn918_1	0.890032
n173_6	0.890094
m196_6	0.890317
n155_19	0.89039
n145_23	0.890486
j634_1	0.890591
n128_41	0.891038
j12_1	0.891403
i578_5	0.891616
n132_107	0.891648
opfh0009	0.891698
a13725_4	0.89173
opfn0269	0.891796
a13231_2	0.891799
m23550_4	0.891827
m29456_12	0.89195
b524	0.892011
c230	0.89234
c650	0.892763
f10949_2	0.892785
j267_1	0.893219
i3489_1	0.893276
opfm60546	0.89328
c416	0.893518
opfl0079	0.89371
j21_24	0.893714
opfl0110	0.894025
f30864_2	0.894108
n131_17	0.894219
m45468_2	0.894315
f3029_1	0.894349
m45317_9	0.89439
ks470_3	0.894486
f68934_2	0.894642
n149_13	0.894653
f7508_2	0.894763
f20385_1	0.894828
j647_8	0.894838
e20800_1	0.894851
f64738_5	0.895104
m30027_1	0.895296
ks66_7	0.895467
opfm60514	0.895562
ks371_8	0.895622
n151_61	0.895669
f64345_2	0.895795
kn307_1	0.895821
m37773_1	0.895911
opff72518	0.896038
ks94_5	0.896141
ks1030_5	0.896166
ks239_7	0.896345
c558	0.896395
n152_8	0.896424
m21626_4	0.896501
opfk12913	0.89654
opfi17683	0.896659
kn408_1	0.896964
km2319_1	0.897182
b215	0.897189
n132_177	0.897207
m43799_11	0.897254
n128_94	0.897402
m57163_1	0.897694
opfm60491	0.89776
f61881_1	0.897774
n150_60	0.898117
f46181_1	0.898277
c237	0.898526
e383_1	0.898804
b265	0.898806
i16149_1	0.899069
f36721_5	0.899178
b145	0.899275
d49176_67	0.89929
i12310_2	0.899293
f69951_2	0.89967
i8781_1	0.900066
i3164_2	0.900119
opfg0029	0.90032
ks79_3	0.900337
d16785_26	0.900457
c693	0.900485
f20448_1	0.900559
f11624_1	0.900569
l2_57	0.9006
e29615_1	0.900731
c563	0.900951
c187	0.900989
m31208_9	0.90106
n134_2	0.901104
f14029_1	0.901277
f10429_3	0.90132
i6032_1	0.901403
f51170_1	0.902067
e1341_1	0.902132
ks152_1	0.902134
n168_36	0.902316
e4247_1	0.90279
m1102_1	0.902878
ks818_2	0.902888
f4218_1	0.903311
ks244_2	0.903348
n145_22	0.903389
b190	0.903412
l2_51	0.903422
ks59_3	0.903525
m36520_4	0.903597
n134_41	0.903605
j53_39	0.903666
e29469_3	0.903749
ks3_4	0.903772
j269_1	0.903908
kn5081_1	0.904018
opff72514	0.904248
f14846_2	0.904569
f39428_1	0.90462
e6534_1	0.904677
j82_7	0.904928
m26257_1	0.905018
opfblob0159	0.905039
f68714_2	0.905307
c46	0.905413
n128_71	0.905869
opfi17732	0.905889
j141_1	0.905914
n157_41	0.906035
n158_7	0.90604
j3424_1	0.906154
f5206_4	0.906184
l2_30	0.906425
f52206_4	0.906577
m38941_6	0.906676
m34107_1	0.906984
ks373_1	0.907223
kn1713_1	0.907305
a24704_11	0.90734
ks51_11	0.907381
n132_184	0.907414
ks97_6	0.907999
kn2020_1	0.908093
d12635_33	0.908366
m57341_2	0.908433
f67281_1	0.908505
j120_15	0.90868
m32527_1	0.908811
ks26_1	0.908844
b282	0.908891
n165_9	0.908926
d34646_1	0.908928
f11919_1	0.908976
n132_54	0.909029
opfm60521	0.909039
opfb0687	0.909046
i16129_1	0.909094
i4719_5	0.909107
opfn0268	0.909235
n134_76	0.909289
i9598_3	0.909325
e27723_15	0.909348
ks244_1	0.909389
z_2_60	0.909568
i4780_1	0.909623
n132_122	0.909667
ks379_5	0.909828
opfi17676	0.909992
km1570_4	0.910027
opfi17739	0.910039
m32529_1	0.910368
f43064_1	0.91064
ks826_2	0.910889
ks349_10	0.910897
f67639_2	0.91092
b68	0.910963
d12635_36	0.910992
ks142_1	0.911056
l2_201	0.911222
m33739_6	0.911265
l2_53	0.911536
f27079_1	0.911561
ks497_1	0.911737
l2_253	0.911743
c689	0.911862
f45296_2	0.911876
n127_39	0.911922
c528	0.912006
opfl0027	0.912092
f8027_1	0.912366
f49071_1	0.912373
l1_85	0.912429
c291	0.912436
f1021_2	0.912491
b579	0.91263
f24393_1	0.912729
j45_1	0.912735
kn330_1	0.91276
n149_18	0.912793
opfblob0191	0.913181
m8032_6	0.913251
m42736_1	0.913288
j5665_24	0.913351
opfi17685	0.913383
i14729_1	0.913502
n159_4	0.91357
i7196_2	0.913716
n131_52	0.913741
d33539_29	0.913923
m54626_1	0.913993
f52797_1	0.914001
f53383_7	0.914073
f45252_1	0.91425
m18079_5	0.914399
b170	0.914549
kn3690_1	0.914574
m44175_1	0.914586
b363	0.914832
l2_72	0.914999
j239_10	0.915034
i8129_1	0.915117
f45228_1	0.915334
f18525_1	0.915487
opfa32039	0.915596
e20260_8	0.915669
b554	0.9159
n150_49	0.915989
opfk12898	0.916142
ks3180_1	0.916146
e2738_1	0.916335
f54003_1	0.916544
m58361_2	0.916645
j797_1	0.916655
j43_15	0.916712
m33739_10	0.916844
m3777_1	0.917136
d16785_11	0.917231
n157_45	0.917584
i15913_1	0.917762
d17715_13	0.917776
d33539_49	0.917816
a10325_26	0.918073
opfl0101	0.91817
n130_30	0.918179
opfh0025	0.918213
ks732_1	0.918323
l2_147	0.918373
b428	0.918422
ks8_4	0.918589
ks424_13	0.918847
n151_37	0.918915
f54899_1	0.919229
n133_36	0.919886
e13603_1	0.920118
ks85_6	0.920858
i14956_1	0.921049
d17715_85	0.921318
f48424_3	0.921373
l3_22	0.921806
m17497_1	0.921834
f12330_1	0.92184
j43_19	0.922071
f28313_1	0.922075
i3668_1	0.922107
f64549_1	0.922196
d12635_47	0.922314
opfm60504	0.922338
opfd67010	0.922565
n130_43	0.922701
f20448_4	0.922734
opfi17688	0.922773
n132_131	0.922838
ks586_5	0.92292
ks387_2	0.92299
i8256_1	0.923077
d17715_110	0.923539
j6_4	0.923542
n137_10	0.923602
n138_3	0.923616
f4524_3	0.923632
ks115_1	0.923828
j81_1	0.923876
f14409_1	0.923881
m6114_1	0.924025
e6820_1	0.924093
i13129_1	0.924255
e18868_1	0.924258
n150_89	0.92441
m23550_5	0.924473
opfc0774	0.924957
m53642_4	0.925076
a14801_7	0.925122
ks424_5	0.925198
f61158_1	0.925832
c332	0.925996
d64289_1	0.926069
ks80_1	0.926218
f357_2	0.926504
f29632_5	0.926839
c113	0.926951
ks83_16	0.926987
n130_25	0.927131
f45683_2	0.927243
opfl0151	0.927599
n128_66	0.927725
opfblob0163	0.92789
ks415_1	0.928118
opfk12908	0.928151
j116_7	0.928156
d17715_12	0.92843
ks85_8	0.92847
opfj12807	0.928594
f57661_1	0.928829
ks66_16	0.928862
n132_40	0.928928
ks25_9	0.928945
n153_15	0.929258
e11202_1	0.929275
e18877_2	0.92928
i4719_6	0.92928
ks1717_1	0.929305
n159_10	0.929306
opfl0071	0.929554
i5252_1	0.929781
m59807_1	0.929845
f19828_2	0.929904
n145_36	0.929982
e7279_3	0.930065
ks510_8	0.930263
n154_2	0.93035
m20989_1	0.930409
opfm60489	0.930478
n151_35	0.930633
i17174_3	0.930642
n127_5	0.930773
j1249_1	0.930913
n150_76	0.930998
m3928_2	0.931043
j65_14	0.931108
i1393_1	0.931473
f48446_1	0.931647
i17310_6	0.931952
ks97_9	0.93212
e26140_1	0.932168
j12778_4	0.932186
j22_1	0.932211
f2650_2	0.932361
c700	0.932363
opfh0011	0.932702
ks202_5	0.932935
e26598_3	0.932946
opfi17693	0.933333
j120_9	0.933344
j53_50	0.933376
d6287_21	0.933574
m30810_1	0.933591
f68474_2	0.933604
ks75_9	0.933643
n130_47	0.933752
n132_22	0.93392
b110	0.934039
opfn0274	0.934335
ks68_12	0.934362
m32649_1	0.934403
opfd66987	0.934415
c56	0.934447
i5180_1	0.934531
ks539_1	0.934542
m43799_8	0.934558
n153_9	0.934566
e29567_9	0.934628
n135_27	0.934801
e21208_5	0.934807
kn7692_2	0.934813
a3310_6	0.934989
m29747_1	0.935008
opfi17689	0.935111
e23784_1	0.935136
f11491_1	0.935162
n165_1	0.935507
opff72499	0.93554
e12201_2	0.935581
c179	0.935758
j21_6	0.935802
m8199_1	0.935918
i15927_7	0.93597
f7632_1	0.936136
l3_1	0.936142
opfblob0161	0.936273
ks210_17	0.936463
m43376_1	0.936615
f10154_1	0.93663
m196_2	0.936852
ks172_2	0.937207
n141_55	0.937211
d33675_1	0.937354
e7132_1	0.937458
l2_98	0.938102
ks41_1	0.938169
j197_1	0.938365
f22828_1	0.938399
kn802_1	0.938424
d33539_23	0.938488
kn2174_2	0.938614
n159_12	0.938724
f68446_2	0.938724
c322	0.938738
f49439_1	0.938819
n171_3	0.93905
e18031_4	0.939055
m16622_6	0.939328
ks113_1	0.939564
i15861_1	0.939647
i16936_3	0.939706
ks44_11	0.939764
c698	0.939846
m39036_1	0.939893
f58910_2	0.939928
n150_16	0.940076
f15503_1	0.940148
d12635_22	0.940287
c40	0.940311
n131_51	0.940399
opff72495	0.940721
m789_3	0.940926
ks595_2	0.941017
m25872_1	0.941102
kn569_3	0.941141
m34743_1	0.941178
n133_39	0.941507
m16407_5	0.941601
n136_13	0.941741
opfblob0040	0.941834
n150_50	0.941958
b458	0.942457
e27433_3	0.942575
ks230_1	0.942679
f42552_1	0.942724
z_8_60	0.942762
f15410_2	0.942776
n150_27	0.942885
j485_4	0.943188
j82_3	0.943206
j239_5	0.943217
f17989_2	0.943258
n150_8	0.943341
n132_147	0.943452
f60886_1	0.9436
j33_27	0.94404
f20385_2	0.944083
j106_11	0.944347
n141_27	0.944469
i3638_1	0.9445
i5700_1	0.944522
e1197_9	0.944572
m14235_1	0.944639
ks83_8	0.944742
ks42_2	0.944772
a8010_10	0.944779
n145_12	0.944823
n128_38	0.945113
b372	0.945232
m7883_5	0.945349
m29456_2	0.945523
opfh0017	0.945559
kn1106_1	0.945678
opfm60531	0.945689
m50253_1	0.946247
n134_91	0.946376
[truncated: 2,652 more rows]

## Sheet: average FC K1 Schizont
Oligo ID	avg FC
opfl0023	0.0702137
j33_20	0.164502
f5951_1	0.171906
f3492_1	0.193979
j151_6	0.195981
opfi17673	0.215066
m26214_1	0.218421
opfj12793	0.220127
m26245_8	0.235657
c336	0.242401
a4003_1	0.260202
opfj12796	0.2659
opfi17734	0.284329
m3816_2	0.284425
e13140_2	0.29657
m25683_1	0.299979
z_5_100	0.301582
j43_10	0.304125
m3696_2	0.314881
opfblob0026	0.316177
opfn0263	0.317398
ks79_7	0.319157
kn63_3	0.320878
z_5_90	0.324616
n149_11	0.331098
ks54_4	0.332955
opfh0012	0.335177
opfm60476	0.33712
c608	0.337266
opfblob0109	0.33934
opfl0110	0.34214
d17715_8	0.344827
ks157_18	0.34928
opfblob0044	0.350634
m12812_7	0.351617
e21208_1	0.355907
opfl0111	0.355969
n155_21	0.362588
e12201_2	0.363341
n181_16	0.364958
m30262_1	0.366889
opff72457	0.369246
opfblob0144	0.373013
b64	0.373028
b198	0.373796
n128_103	0.378451
opfl0131	0.379641
opfk12894	0.383201
j27_1	0.38529
n140_5	0.386377
m57341_1	0.392234
ks91_2	0.39894
opfl0144	0.400049
c720	0.401071
a1411_1	0.401674
n148_11	0.404768
opfblob0154	0.406046
j180_11	0.406859
opfl0099	0.408404
opfi17709	0.411845
c474	0.411942
opfd66958	0.412928
opfn0260	0.416857
j33_3	0.419043
j53_48	0.424641
f21902_6	0.424675
n150_49	0.425562
n132_155	0.42897
opfc0759	0.431004
n127_57	0.433151
n128_11	0.434579
opfh0003	0.434751
f54828_9	0.437767
e714_14	0.44039
i16326_1	0.443272
n187_2	0.444707
e16790_2	0.44626
n157_38	0.446491
ks624_8	0.448365
n134_11	0.44881
m24561_15	0.448905
f4481_1	0.449524
j322_1	0.450636
opfi17735	0.4518
j53_56	0.454623
opfk12902	0.454628
ks431_2	0.457308
ks75_18	0.460337
opff72485	0.461973
a10325_30	0.463852
i1689_2	0.465186
i6032_2	0.465948
d33539_76	0.468215
opfi17654	0.470719
c259	0.470832
ks5580_2	0.473649
e27341_1	0.47518
opfblob0054	0.47527
c183	0.47733
m53850_2	0.478606
kn3544_2	0.479276
opfn0273	0.479406
e16439_1	0.479653
m35008_2	0.482071
a10325_29	0.483804
opfblob0069	0.485986
opfi17662	0.486145
ks453_3	0.48753
opfj12816	0.487836
ks75_15	0.489286
j34_4	0.492672
c491	0.497115
j198_5	0.498003
ks44_1	0.502358
z_5_80	0.503597
opfn0279	0.504267
ks259_2	0.505251
j151_11	0.506351
b588	0.506867
f16951_1	0.507068
n150_93	0.511907
opfl0116	0.514732
opfc0749	0.516058
n132_93	0.516266
ks91_4	0.516449
m42932_3	0.518415
opfblob0058	0.519796
ks349_10	0.520287
i12861_2	0.521099
n152_1	0.521496
opfm60494	0.524461
opfi17635	0.524548
i607_1	0.528016
opfl0141	0.528184
opfg0046	0.528195
f25565_1	0.52901
c257	0.529937
n165_15	0.529982
ks51_12	0.533466
n150_48	0.533824
opff72498	0.534439
m33739_5	0.534456
z_5_70	0.535519
n131_55	0.536174
opfb0687	0.536795
ks838_5	0.537619
n127_32	0.537981
ks79_3	0.540541
d6287_38	0.541401
opff72412	0.542237
m36754_1	0.542546
opfl0087	0.545442
d23156_20	0.546752
opff72430	0.546798
b547	0.54722
opfi17732	0.547554
d33539_37	0.551026
j17_2	0.553121
i6174_2	0.55369
opfm60477	0.554358
j21_21	0.55441
b178	0.554863
opfd67011	0.556022
opfk12908	0.556772
opfl0005	0.55893
d8137_1	0.559774
opff72425	0.56094
e19631_4	0.561344
m33088_1	0.563699
j53_27	0.564672
i17631_1	0.565746
ks56_32	0.565969
m35930_6	0.56841
opfg0006	0.568499
d44388_1	0.568505
m45727_7	0.568778
opfn0251	0.569174
m15018_1	0.569435
opfm60551	0.571299
f51552_2	0.571522
j153_2	0.57199
opfb0675	0.573571
f4422_3	0.573982
ks509_1	0.574134
n143_30	0.575827
opfd67000	0.575904
opfg0019	0.576453
opfm60485	0.576708
n143_21	0.577008
e17645_1	0.577704
opfi17700	0.577866
opfh0037	0.578544
l2_9	0.578689
i2966_2	0.579601
opfi17691	0.582497
opfm60489	0.582533
i16046_2	0.58276
j33_21	0.583293
opfh0002	0.583666
n165_16	0.584751
j167_14	0.585715
d52830_1	0.586097
opfg0044	0.587151
opff72513	0.588067
i8803_1	0.589157
n137_2	0.589236
c649	0.589768
z_6_100	0.589907
l2_270	0.591195
n134_43	0.591376
opfm60527	0.591471
opfblob0007	0.591472
m5804_3	0.592794
e4159_1	0.593064
e7132_1	0.594223
m44397_14	0.594651
opfb0668	0.595372
f11089_1	0.595705
n150_83	0.59623
e20360_12	0.596738
opfl0081	0.598539
ks31_1	0.598724
i10630_1	0.602616
e17521_1	0.60414
n138_34	0.604351
f17165_1	0.604411
f5206_4	0.605497
n130_39	0.605791
n176_2	0.605975
opfl0103	0.60808
m23550_4	0.608151
f29467_4	0.608521
n130_60	0.610303
i16949_1	0.610913
f50580_1	0.611151
m32813_2	0.611448
m11064_1	0.612007
m16853_1	0.612935
f16133_1	0.61436
opfblob0102	0.614669
m8199_5	0.614905
e18055_2	0.615132
f46381_1	0.615695
opfh0007	0.615747
opfn0261	0.616185
opfm60496	0.616354
e263_7	0.617304
opfn0245	0.617765
f4380_1	0.618433
a14801_13	0.618607
i14413_3	0.620889
opff72470	0.620909
m1020_1	0.622238
j53_28	0.622352
kn7024_1	0.623506
c187	0.624882
l2_212	0.624969
n168_10	0.625208
e13603_1	0.625622
b344	0.625635
opfblob0115	0.626369
f960_4	0.628791
n159_33	0.629002
n182_4	0.629489
ks624_2	0.631443
j318_2	0.632547
ks533_1	0.632747
opfd66997	0.633038
l1_103	0.633221
i11523_2	0.633452
f49857_1	0.63354
e13140_1	0.635448
f19199_1	0.636516
opfi17660	0.636724
e2651_2	0.637009
opfi17641	0.637329
ks83_5	0.638531
f48446_2	0.638764
f56806_1	0.639718
j125_3	0.639844
ks692_10	0.641138
m6508_1	0.642078
d16785_26	0.642151
c145	0.642437
b297	0.643292
e2283_4	0.643769
ks25_10	0.64438
b312	0.645063
opff72450	0.645241
ks509_7	0.645245
m45542_1	0.64577
i11857_3	0.645796
f27679_4	0.646005
m5172_2	0.646134
e4387_1	0.646206
b468	0.646299
f19787_2	0.646409
opff72413	0.646568
m41763_2	0.646705
m1595_2	0.646785
ks1032_1	0.647641
opfm60499	0.647903
opfblob0078	0.648004
d34948_1	0.648717
ks42_6	0.648763
f42112_4	0.648827
n132_180	0.648884
d36666_4	0.65068
opfg0002	0.651535
opfl0104	0.651708
n128_56	0.652254
f35774_1	0.652369
e22147_1	0.652944
n139_23	0.653377
f7828_1	0.653936
m57998_1	0.654954
d17715_102	0.655319
opfh0006	0.655556
n128_88	0.656381
opfblob0103	0.656449
d42243_38	0.657093
m45317_5	0.658165
opfh0025	0.65887
ks83_4	0.660006
n127_29	0.660183
opfg0054	0.661779
opfi17739	0.661949
f6440_2	0.662266
i2629_1	0.66241
c46	0.662874
f63949_1	0.662922
ks76_3	0.662955
m3465_1	0.663396
opfl0048	0.663554
l2_44	0.664445
f51945_2	0.664776
i1884_1	0.664807
opfblob0139	0.665818
opfm60520	0.666242
i8305_1	0.666315
opfi17702	0.667046
i3340_1	0.667058
opfl0159	0.66764
f21150_1	0.667967
b315	0.668286
m54626_4	0.668529
opfi17726	0.668912
opff72480	0.668994
n138_2	0.669394
kn307_1	0.66954
b554	0.669724
f68156_1	0.670083
m29456_3	0.670359
j346_4	0.671931
opfl0134	0.6725
d49176_43	0.672985
m43799_8	0.67315
f6858_1	0.673463
i15861_2	0.673515
m45918_8	0.674248
m29456_8	0.67479
f46183_2	0.674833
n161_2	0.674977
m5299_2	0.675264
d17715_55	0.676512
n143_53	0.676913
a23157_18	0.677253
a3310_30	0.677424
z_5_60	0.677979
ks838_1	0.678091
i5222_1	0.678104
a13725_7	0.678328
opff72427	0.678521
opfm60500	0.678706
d12635_22	0.67973
b397	0.679866
n132_52	0.680068
c195	0.680827
opfh0009	0.681299
d33539_96	0.681738
j267_2	0.682381
ks387_8	0.683219
j33_16	0.683686
n151_52	0.68372
n128_2	0.683845
opfj12798	0.683995
opfd66993	0.684505
opfg0025	0.686514
ks506_1	0.687479
opff72453	0.687566
opfl0045	0.687724
b487	0.687763
f47984_1	0.687776
opfblob0056	0.687903
i3470_1	0.689241
opfl0105	0.689307
m26914_4	0.689908
a10325_26	0.690316
f53081_1	0.691054
m43941_1	0.691568
opfblob0193	0.691612
opfblob0090	0.691833
opfc0750	0.692072
i6033_4	0.692167
m34107_3	0.692666
c684	0.693003
e8769_2	0.69359
kn201_14	0.693888
kn4782_2	0.694019
j110_3	0.694184
n165_14	0.694336
opfi17638	0.694726
ks510_6	0.696452
f3664_1	0.696917
opfn0249	0.697699
opfl0139	0.698143
ks83_8	0.698249
a23157_2	0.698289
ks26_23	0.698844
kn973_2	0.699018
b145	0.699193
n128_49	0.700026
ks100_2	0.700169
f23916_1	0.700412
opfc0768	0.700958
f10141_1	0.701444
n134_140	0.701567
n130_6	0.701856
e15771_1	0.702889
ks8267_1	0.703099
opfblob0111	0.703738
opfm60497	0.703908
c302	0.704678
n132_92	0.705169
m46462_5	0.705396
opfl0097	0.705413
n134_29	0.705677
opfd66970	0.705972
b489	0.706676
opfl0094	0.708032
m34743_8	0.708228
n175_2	0.708595
opfl0035	0.708983
opff72448	0.709018
opfl0055	0.709212
opfl0062	0.709371
m49091_2	0.709673
opfh0039	0.709676
opfl0126	0.709887
l2_196	0.710317
c563	0.710838
n127_37	0.711117
opff72449	0.711334
n134_82	0.711621
opfm60516	0.71166
b124	0.71178
f21821_2	0.712624
e8100_2	0.7127
i14381_1	0.712813
opfl0122	0.71335
f49582_1	0.713605
j53_39	0.713657
n145_23	0.714006
e9164_1	0.714206
ks98_3	0.714447
f54091_1	0.714484
m11919_1	0.714498
m12812_6	0.715235
n141_32	0.715473
l2_114	0.71552
m46462_2	0.715617
n185_7	0.715771
m12883_6	0.715952
a11025_2	0.716001
m38941_10	0.716257
f71665_1	0.716281
a12312_1	0.716508
m56059_3	0.716894
f19828_1	0.717431
m1840_1	0.71755
m48963_4	0.717828
f60188_2	0.718328
ks244_8	0.718519
d42356_1	0.719254
l2_7	0.719431
d33539_15	0.719734
ks168_5	0.719864
n141_14	0.720002
b532	0.72001
opfb0671	0.720506
b77	0.720741
f49665_1	0.721321
n141_40	0.721387
l1_69	0.721495
f41218_2	0.723114
b342	0.723524
c191	0.7238
ks41_1	0.72431
f43438_3	0.724487
a8109_6	0.724874
m6741_1	0.725348
n134_119	0.726084
e1341_1	0.726137
f692_1	0.72617
e27247_7	0.726175
ks497_1	0.726284
l2_60	0.726502
e17711_1	0.726986
n143_44	0.728243
n157_45	0.728319
c679	0.729095
opff72475	0.729681
opfg0023	0.730013
opfl0129	0.730666
f48446_5	0.730707
c56	0.730754
f59453_1	0.730931
m30813_3	0.731071
l2_277	0.73159
opfl0060	0.731682
opfl0076	0.731739
m43799_10	0.731826
i14670_5	0.732074
f11232_1	0.732291
n132_162	0.732468
i14812_1	0.732646
opfg0035	0.732647
c630	0.732678
d33539_32	0.732741
f22233_3	0.733339
opfg0036	0.733717
d17715_17	0.733951
opfd67013	0.735174
f30663_1	0.735641
c190	0.735863
d23156_45	0.735895
opfm60498	0.736339
opfblob0124	0.736701
n134_141	0.73679
a8010_1	0.736873
kn945_1	0.737047
e19346_1	0.737093
f71594_1	0.737254
c540	0.737475
n140_6	0.737929
n159_38	0.737948
j70_1	0.738413
i2631_1	0.738636
f42703_3	0.739386
f45524_1	0.739478
n140_10	0.739688
n138_48	0.739705
j425_3	0.73983
kn1506_2	0.739979
f11323_5	0.741013
i13056_1	0.74135
m46791_1	0.741831
ks111_1	0.74222
e3215_3	0.742256
n155_14	0.742279
ks1_2	0.742515
b262	0.742519
f1761_1	0.742892
n149_12	0.743
f14846_2	0.743168
m45177_6	0.743185
f2600_1	0.74367
e16122_2	0.744027
j938_1	0.744872
n133_70	0.744883
z_7_80	0.745273
ks202_8	0.745431
d33539_31	0.745714
e29615_3	0.746614
f54011_1	0.746825
f71176_2	0.748056
f740_1	0.748059
f57713_2	0.749489
ks76_9	0.750093
n128_20	0.750754
opfi17661	0.750935
b70	0.750988
e1086_1	0.751492
opfd66956	0.75165
ks8_2	0.751762
m18079_5	0.75198
ks818_2	0.752336
i2533_1	0.752551
b587	0.752704
ks189_1	0.75275
n168_21	0.752838
opfm60467	0.753144
n137_5	0.753271
f69171_1	0.753675
d42243_37	0.753697
b550	0.753831
i2966_1	0.754326
kn6804_2	0.754783
n128_98	0.754809
opfn0250	0.754863
f45354_1	0.754945
m49138_2	0.755114
f7915_1	0.755123
m11356_5	0.755136
m633_1	0.755711
f51170_1	0.755787
m58927_1	0.755799
opfe30211	0.756382
i6851_1	0.756472
opfm60536	0.75655
j483_2	0.757047
m26734_1	0.75728
d3593_1	0.757351
b265	0.7578
n145_22	0.757885
n181_18	0.758136
opfh0029	0.758492
m21855_1	0.758681
opfl0121	0.75908
i12057_1	0.759093
m26091_3	0.759263
b303	0.759391
ks97_1	0.759833
opfblob0156	0.75992
d49176_32	0.760293
j268_1	0.760631
l3_38	0.760713
e263_8	0.761141
ks565_1	0.761277
ks196_2	0.761626
ks157_2	0.76187
opfblob0117	0.762321
a22429_1	0.762694
ks59_3	0.762864
ks127_2	0.763179
n173_5	0.763661
f54899_1	0.76414
opfblob0099	0.764168
opfm60529	0.76457
opfb0689	0.764575
ks152_12	0.764932
j147_3	0.765076
ks157_19	0.765361
m31208_15	0.765622
m25872_4	0.765749
f5836_1	0.765876
opfi17694	0.766175
f48424_3	0.766571
j106_9	0.766612
n134_132	0.766677
b73	0.767012
opfm60528	0.767116
d10917_2	0.767154
j58_2	0.767196
n244_2	0.767514
ks266_8	0.767878
m58024_2	0.767989
opff72446	0.768019
ks826_1	0.768332
a6420_10	0.768463
e13057_1	0.768468
ks1032_6	0.768963
opfi17659	0.769096
m48367_1	0.769143
e20800_1	0.76925
m48629_1	0.769277
e30210_1	0.769553
c277	0.770167
opfl0096	0.770314
n134_30	0.770606
opff72439	0.77089
c367	0.770898
f45432_1	0.771305
opfl0138	0.771329
ks136_3	0.771345
opfk12914	0.771373
f25456_1	0.771524
n155_12	0.771622
opff72452	0.771842
n132_40	0.771877
opfi17716	0.772103
opff72502	0.772402
opfi17668	0.772782
b527	0.773407
n135_20	0.773409
opfg0009	0.773859
opfl0069	0.775044
opfblob0088	0.775157
opfb0670	0.775189
i8129_1	0.775378
i15719_4	0.775426
b379	0.77552
d49176_31	0.775654
opfl0074	0.775864
ks387_5	0.775965
ks822_5	0.776345
d13582_1	0.776471
f54372_1	0.77678
n151_9	0.776842
j12_1	0.77702
ks1717_1	0.777087
m45542_5	0.777629
f57661_1	0.777862
f8009_1	0.777966
e20313_1	0.778099
opfj12815	0.778196
c171	0.778385
ks56_11	0.779006
f39343_3	0.779264
ks26_12	0.779325
b481	0.779367
n128_23	0.779501
e20827_1	0.779628
f8027_3	0.779637
f45236_1	0.779708
j141_1	0.779895
kn408_1	0.780882
c380	0.780934
n159_56	0.781028
m5455_3	0.781058
opfi17713	0.781147
m30027_1	0.781375
c174	0.781715
opfl0109	0.781797
f69212_1	0.781827
j352_1	0.781861
j53_55	0.781872
e29567_9	0.782095
e3215_1	0.782101
j53_22	0.782155
f61691_1	0.78225
l1_28	0.78226
f59197_1	0.782273
f46067_1	0.782411
j2629_1	0.782483
n138_31	0.782694
m8199_4	0.782777
a14801_2	0.782913
c559	0.783288
i11161_1	0.783477
n155_3	0.783878
f28460_1	0.783925
b490	0.784094
f67106_1	0.784571
d17715_132	0.784702
e10758_2	0.785077
opff72477	0.78523
f29880_1	0.785548
f7374_2	0.785647
opfi17685	0.785934
n128_85	0.786105
i5180_2	0.786412
kn862_1	0.78673
l1_85	0.786804
n138_104	0.786917
ks26_11	0.787017
kn2161_1	0.787528
i16748_1	0.787627
n143_55	0.787878
i9333_1	0.787925
m57785_3	0.787987
ks117_2	0.788226
m13314_1	0.78837
n128_83	0.7887
n165_9	0.788945
n151_10	0.79
m8032_6	0.790108
e26577_2	0.790492
m2931_3	0.7905
m32775_1	0.790598
n150_89	0.790616
c256	0.790891
l2_72	0.790971
l2_246	0.791403
n134_67	0.791418
n141_57	0.791749
opff72483	0.791753
opfblob0100	0.791755
e26934_1	0.79186
e27596_2	0.791863
d17715_104	0.792144
f4565_1	0.792362
c143	0.792646
f27391_1	0.792739
f2227_1	0.793109
opfl0091	0.793285
n157_13	0.793397
ks1071_3	0.793577
ks115_6	0.793979
i17587_1	0.793984
n132_97	0.794034
i13124_2	0.794082
n137_30	0.794211
m36754_21	0.794484
opff72486	0.794553
f57777_2	0.794712
f45556_3	0.7948
f26809_3	0.795044
j163_8	0.795064
l2_126	0.795116
f13746_1	0.795127
opfi17715	0.795421
j2896_1	0.795522
b496	0.79561
km765_1	0.795739
ks506_6	0.795849
c439	0.795993
opfl0089	0.796063
n197_1	0.796289
ks244_7	0.796434
l3_22	0.79665
opfg0043	0.796652
e20827_3	0.79691
m29456_2	0.797158
opfl0125	0.797496
ks101_4	0.798441
m38472_2	0.798871
d33539_49	0.799073
j106_6	0.799361
a31914_8	0.799446
n132_184	0.799631
kn657_1	0.799669
d55287_1	0.799677
ks56_24	0.799677
a13725_4	0.799679
opfg0029	0.799816
j33_27	0.800231
d13568_1	0.800396
n189_1	0.800509
b95	0.800716
m49091_1	0.800851
n145_33	0.801108
ks25_5	0.80121
opfblob0143	0.801415
opfblob0011	0.801788
i8963_1	0.802923
m35930_10	0.803298
d33539_28	0.803373
f26666_3	0.804036
opfa32038	0.804352
f21981_2	0.8044
j22_4	0.804417
m19791_1	0.804549
kn8928_4	0.804569
m17230_1	0.804861
l2_154	0.804972
j197_1	0.805263
d33539_29	0.805356
m7078_1	0.805478
m45339_1	0.805566
b541	0.806189
j69_1	0.806334
ks98_2	0.806879
ks12_11	0.807093
j181_4	0.807334
m52144_1	0.807365
j167_13	0.807453
c558	0.807765
m29414_1	0.807799
m53752_1	0.8078
n132_178	0.807958
m43116_3	0.807967
c686	0.807993
opfl0071	0.808127
j65_1	0.808225
m25032_3	0.808789
opfn0267	0.808834
opfblob0186	0.808888
opff72512	0.808914
m10202_2	0.808949
ks509_4	0.809461
j43_15	0.809683
opfj12800	0.809764
b117	0.810577
z_3_50	0.8112
ks1032_5	0.811475
m4548_2	0.811796
b88	0.812013
f17508_1	0.812107
l1_48	0.812134
n132_188	0.812275
kn12363_3	0.812365
d33539_55	0.812383
b277	0.812532
j17_1	0.813104
f45252_1	0.813535
e26771_4	0.813841
f63677_2	0.814371
b172	0.814859
e11514_1	0.814893
e26351_1	0.8149
kn5905_4	0.815072
i5974_1	0.815171
opfi17697	0.815216
n143_57	0.815474
e23195_1	0.815562
opfm60486	0.816247
f23526_1	0.816289
c180	0.816661
f22946_1	0.816712
i15908_1	0.816736
i3112_2	0.816755
ks51_9	0.817107
n138_82	0.81716
e3552_1	0.81729
b371	0.817539
c129	0.817578
m21368_1	0.817634
kn3709_1	0.817826
m54626_1	0.817837
j45_11	0.818002
f31053_2	0.818225
d42243_42	0.818574
l2_188	0.818933
d33539_85	0.818947
opfi17717	0.819053
m33512_2	0.819295
f71130_3	0.819365
ks66_7	0.81944
f64125_1	0.819496
ks387_2	0.819549
j425_2	0.819628
ks592_1	0.819753
m5949_1	0.819973
m3590_1	0.820088
n129_29	0.820281
e3185_7	0.820364
kn2029_4	0.820587
l2_55	0.820629
f22770_1	0.820783
e8914_1	0.821418
n151_65	0.82162
km695_2	0.821899
j65_10	0.821921
n143_19	0.822115
i12816_1	0.82218
m50721_4	0.822198
opfl0073	0.822265
kn274_1	0.822393
opfh0004	0.822544
c179	0.822658
j227_2	0.822737
z_5_50	0.822972
n149_2	0.823046
opfl0082	0.823196
f70095_1	0.823681
opfh0021	0.823691
j21_1	0.823742
m35892_1	0.823926
z_7_70	0.82394
m43799_15	0.823942
i5180_1	0.824046
j53_30	0.824056
f34582_1	0.824507
opfl0106	0.824681
i17263_1	0.824717
l2_149	0.824765
j634_2	0.824796
m37080_3	0.824837
ks13_2	0.824885
z_6_90	0.825015
n137_4	0.825491
b551	0.825527
n171_4	0.825527
n130_25	0.825658
f54003_1	0.825781
f2530_1	0.825798
j170_18	0.825812
i10209_1	0.82591
f62285_1	0.825978
opfl0150	0.826018
n159_25	0.826055
e19695_3	0.826576
opfl0016	0.826577
ks89_3	0.826612
ks48_18	0.826613
a8010_25	0.826664
opfblob0020	0.826873
f65819_1	0.826933
e8225_2	0.827045
opfblob0177	0.827202
opfl0114	0.827315
l1_87	0.827346
e18440_4	0.827353
e27247_3	0.827385
ks624_4	0.827465
c345	0.827587
a16122_1	0.827689
n143_16	0.827723
a14195_4	0.827819
m10202_5	0.82789
j163_7	0.828085
d12635_21	0.828287
l1_32	0.828419
ks453_5	0.828568
f52397_2	0.828596
opfm60523	0.828641
m126_2	0.82877
e679_1	0.829024
opfblob0001	0.829179
n150_58	0.829217
opfn0271	0.829259
f20448_4	0.829264
e27723_3	0.829271
m41547_1	0.829352
m43799_14	0.829358
b428	0.829549
opfi17680	0.82961
ks101_18	0.829742
l2_140	0.829914
opfl0021	0.829967
c584	0.83008
n145_9	0.830462
m31208_5	0.830488
j27_14	0.830524
m57341_2	0.831014
n132_27	0.831108
i13417_1	0.831163
m196_6	0.831286
e15697_1	0.831309
j53_46	0.83145
f5429_1	0.831622
b567	0.831734
n132_171	0.83185
m5464_1	0.832064
e7418_1	0.832133
f13223_1	0.832306
m5968_1	0.832336
f53854_2	0.832572
f42552_1	0.832695
c624	0.832703
i2739_1	0.832796
ks225_2	0.832804
i9545_1	0.832832
d16785_38	0.833116
m35935_2	0.833679
f51756_1	0.833938
opfd67016	0.834127
n181_17	0.834315
j461_7	0.834737
n127_54	0.835132
n141_50	0.835145
ks75_10	0.83519
f36120_1	0.835283
c137	0.835442
ks826_2	0.835532
ks1022_5	0.83565
f49538_1	0.835877
d23156_40	0.835921
f26422_1	0.836139
opfl0161	0.836372
f17275_1	0.83659
f10724_1	0.83678
a8010_4	0.836869
n136_6	0.836927
opfl0024	0.83715
m22193_2	0.837593
opfl0147	0.837813
m35892_2	0.837903
m59807_1	0.838081
d49176_3	0.838188
e15509_13	0.838284
f36648_2	0.838347
j85_3	0.838703
m5299_3	0.838726
opff72463	0.839134
z_1_100	0.83924
ks488_9	0.839377
b557	0.839713
m1102_1	0.839878
m37116_3	0.839955
n157_12	0.840253
f23172_1	0.840456
f8433_1	0.840476
m19559_4	0.840657
f50551_1	0.840734
l2_200	0.840874
m17181_1	0.840949
ks44_3	0.841093
m42506_1	0.841144
i578_5	0.841307
e263_4	0.841621
n138_3	0.841827
i15870_1	0.84204
n143_10	0.842162
b577	0.842241
d12635_47	0.842254
f56837_1	0.842301
z_3_60	0.842693
opfl0008	0.842944
kn1621_1	0.843059
n152_5	0.8431
m32529_1	0.843125
f43064_2	0.843165
n185_2	0.843192
m57443_3	0.843322
n151_33	0.843577
f18577_2	0.843676
j43_19	0.843753
c637	0.843885
i1520_1	0.843887
n164_1	0.84416
opfblob0161	0.84432
f19110_2	0.844523
opfi17706	0.844607
ks2_11	0.844776
n134_1	0.845072
n151_31	0.845172
f12867_3	0.845299
e29615_2	0.845614
f24631_2	0.845771
opfl0119	0.845989
a14680_4	0.846058
opff72482	0.846146
n138_12	0.846378
ks56_17	0.846454
b405	0.8467
d17715_40	0.8468
f24156_1	0.846803
n151_36	0.847025
n159_1	0.847112
i8013_1	0.847466
j478_10	0.847602
a8109_9	0.847621
n155_7	0.847666
kn1300_3	0.848154
m19188_2	0.84878
n155_19	0.848862
j104_1	0.849068
l2_158	0.849493
opfl0101	0.849551
e18984_1	0.84977
c332	0.849874
ks349_9	0.850058
d49176_46	0.85008
f42062_1	0.850151
n139_5	0.850567
j33_12	0.850712
m40872_1	0.851271
j110_4	0.851318
m60243_1	0.851355
z_3_70	0.851358
l2_201	0.851455
n135_6	0.851486
kn609_1	0.851544
b458	0.85161
m8032_4	0.851787
f45342_2	0.851914
n149_4	0.851914
f36803_1	0.851942
ks83_16	0.851945
f27079_1	0.852147
i11291_1	0.852204
n134_61	0.852301
f71520_1	0.85238
opfl0136	0.852481
e9244_1	0.852567
l2_150	0.852821
f403_1	0.852884
m19188_9	0.852894
m48963_1	0.853106
c646	0.853177
opff72495	0.853867
m1042_2	0.853969
opfm60508	0.854058
m29405_1	0.854227
f70278_2	0.85435
m48367_2	0.854526
ks82_3	0.854673
d33539_61	0.854676
j73_17	0.854823
b534	0.854829
n137_45	0.85505
kn2241_1	0.855069
opfc0771	0.855075
m34107_1	0.85516
l2_224	0.855196
c442	0.855504
m6581_1	0.855638
f62610_5	0.85589
f11776_1	0.856163
e26771_1	0.856166
z_3_80	0.856284
z_1_50	0.856355
ks51_6	0.856564
n127_48	0.856828
e26525_1	0.857351
m24889_1	0.857415
d33564_2	0.857527
km333_1	0.857937
l2_253	0.858178
f55601_1	0.858321
f24459_1	0.858543
e4826_1	0.8588
n134_51	0.858944
l3_34	0.859115
m53850_1	0.859356
c470	0.859386
d17715_26	0.859656
opfa32039	0.859848
f43935_4	0.859874
opfl0132	0.859987
e18169_1	0.860012
f67874_1	0.860205
n133_40	0.860369
e17330_2	0.86048
n134_101	0.860747
ks26_15	0.861019
opff72459	0.861094
m18539_2	0.861412
n130_21	0.86172
f16210_1	0.862012
d33539_64	0.862049
ks115_1	0.862089
f38306_1	0.862201
kn9796_3	0.862207
e2283_7	0.862625
a13725_5	0.862886
n130_4	0.862962
opfd66964	0.863012
f9676_1	0.863302
c322	0.863652
kn5868_2	0.863695
opff72478	0.863791
m24933_5	0.863815
ks371_8	0.863837
z_5_40	0.86405
m3696_4	0.864221
n138_70	0.864505
n149_13	0.864519
m29456_12	0.864753
e27723_10	0.865001
n138_24	0.865025
i12812_3	0.865062
ks424_5	0.865427
opff72444	0.865585
e21786_1	0.865918
f31008_1	0.866018
kn2020_1	0.866052
i14747_2	0.866112
f16280_1	0.866447
l1_31	0.867051
f57064_1	0.867199
m22545_1	0.867225
opfm60524	0.867365
opfm60526	0.867474
ks230_1	0.867541
n130_52	0.868137
m30810_1	0.868166
a14801_9	0.868468
c689	0.868623
m789_3	0.869052
f6077_1	0.869098
f59165_1	0.869196
opfg0053	0.869274
ks173_8	0.869337
i5700_1	0.869377
km3516_4	0.869593
i1033_3	0.869684
n143_25	0.869783
d14952_1	0.870053
e15250_1	0.870122
e1220_1	0.870401
l2_117	0.87044
f10637_1	0.870453
a8010_30	0.870456
m35780_4	0.870472
a8010_10	0.870525
n148_7	0.870553
f35531_1	0.870678
c240	0.870753
a31870_1	0.870877
e13599_1	0.871081
ks75_9	0.871084
m44397_12	0.871134
a8408_1	0.871193
j1011_3	0.871381
n132_107	0.871439
b565	0.871539
ks602_1	0.871571
ks32_6	0.871763
l2_265	0.87197
a21885_9	0.872068
opfh0011	0.872186
e6534_1	0.872224
ks732_1	0.872272
j379_2	0.872341
m8199_1	0.872802
opfi17633	0.872842
j65_14	0.872844
d34948_3	0.872851
f18525_1	0.873107
c105	0.873178
f960_1	0.873217
j21_7	0.873246
m2931_1	0.87348
i13218_1	0.873484
opfi17737	0.873514
d12635_37	0.873656
j62_1	0.873971
n133_13	0.874082
m24561_3	0.874135
n147_21	0.874186
m14235_1	0.874257
b543	0.874558
f16754_1	0.874902
opfblob0065	0.875092
j53_42	0.875113
i12692_1	0.875157
e18454_2	0.875495
n150_33	0.876029
j219_1	0.876293
j53_26	0.876478
n155_34	0.87653
ks189_2	0.876604
f54097_1	0.876807
n151_61	0.876956
m53642_4	0.877124
f15289_3	0.877144
d4043_3	0.877258
e29469_3	0.877292
j227_6	0.877371
f49959_1	0.877522
opfm60511	0.877788
f49677_1	0.877856
l3_19	0.877947
j379_5	0.878124
j634_1	0.878162
n133_43	0.878206
opfk12907	0.878354
e27173_1	0.878881
ks732_4	0.878883
n141_27	0.879001
e12852_1	0.879061
f30728_1	0.879102
f15196_1	0.879134
i16837_2	0.879221
n138_10	0.879259
f55130_1	0.879266
e13220_3	0.879297
opff72509	0.879587
ks560_5	0.879765
ks111_4	0.879786
j269_1	0.879842
f64347_2	0.879966
n132_101	0.879991
m23550_5	0.880312
j4379_1	0.880615
opfl0156	0.881039
opfblob0182	0.881349
n151_55	0.88147
f57982_1	0.881632
ks157_5	0.881717
f24726_1	0.881941
f47068_6	0.882028
ks510_13	0.88203
m7574_1	0.882222
kn1058_1	0.882346
n141_55	0.882366
m49439_1	0.882397
ks565_10	0.88242
ks239_6	0.882431
kn4044_1	0.882438
n134_38	0.882599
opfblob0101	0.882727
i15949_1	0.882733
opfi17690	0.882817
opfl0051	0.882828
m12812_1	0.882834
c472	0.882874
n131_51	0.882876
f54854_1	0.882881
b374	0.882889
ks97_2	0.88293
j4848_2	0.883165
e22273_1	0.883186
a12312_15	0.883319
l2_268	0.883688
opfm60504	0.884011
opfj12803	0.884017
opfg0051	0.884066
b91	0.884084
b579	0.884118
n147_25	0.884136
f54317_1	0.88424
f26774_1	0.884344
opfblob0171	0.88453
d5782_1	0.88494
n168_3	0.885065
e1197_2	0.885319
m50721_5	0.885473
m42658_1	0.885626
b112	0.885847
d33539_47	0.885987
opfi17693	0.886073
a3310_7	0.886107
m18924_15	0.88617
d16785_35	0.886177
f60886_1	0.886269
f8027_1	0.886328
ks79_2	0.886351
j304_1	0.88652
d17715_20	0.886687
i15927_6	0.886814
m4364_1	0.886853
opfblob0130	0.886864
i7196_2	0.886913
f24843_2	0.886937
n134_106	0.887159
opfn0247	0.887188
m1688_1	0.887449
m20989_1	0.887556
opfl0123	0.887613
j45_1	0.887656
c641	0.887881
opfj12792	0.887983
f37850_1	0.887986
e29792_1	0.888302
f10872_1	0.888581
ks94_5	0.88861
m44397_6	0.888698
f62877_1	0.888917
ks259_6	0.888938
z_1_60	0.889516
e383_1	0.889545
n143_12	0.88957
ks783_1	0.889594
j2465_1	0.889601
opfn0270	0.889625
opfj12812	0.89013
c54	0.890308
m29079_1	0.890472
n137_43	0.890519
e18877_2	0.890623
d32606_3	0.890633
j120_1	0.890694
opfd67010	0.890867
i16129_1	0.891033
n156_5	0.891033
f23644_4	0.891161
n132_54	0.89118
a8010_16	0.891428
n155_25	0.891679
ks81_2	0.891688
c688	0.891809
j167_8	0.891826
m22193_10	0.891887
m37794_18	0.891989
m16407_5	0.89219
ks42_1	0.892225
c147	0.892374
n132_133	0.892416
e29792_2	0.892431
l1_43	0.892495
ks3180_1	0.892497
i15544_1	0.892568
c113	0.892722
n132_152	0.892727
e23003_1	0.89284
opfi17688	0.892959
opfm60505	0.892976
opfd66963	0.893057
kn4026_1	0.893097
opfg0007	0.893202
f713_1	0.893208
j512_2	0.893339
n130_46	0.893418
m45177_15	0.893458
n141_41	0.893658
ks89_1	0.893702
n132_181	0.893877
i5572_1	0.89423
f48181_2	0.894252
e13365_1	0.894381
e22471_1	0.894407
f20870_2	0.894513
ks75_1	0.894529
ks12_15	0.894666
ks113_1	0.894671
ks25_19	0.894923
opfc0774	0.895197
n154_2	0.895241
e29615_1	0.895278
ks97_20	0.895325
n130_31	0.895523
n132_186	0.895546
opfl0070	0.89558
n134_142	0.895616
z_1_80	0.895745
d17715_81	0.896
j21_5	0.896271
j293_4	0.89629
opfn0262	0.896296
j120_11	0.8963
i7365_3	0.896602
opfl0107	0.896604
m35008_1	0.896769
l1_95	0.89678
m37145_2	0.896908
f41828_1	0.896977
opfl0143	0.897067
b60	0.897211
f52206_4	0.897219
f15517_1	0.89743
kn3020_1	0.897767
c418	0.897788
opfc0773	0.898013
n150_57	0.898069
m38913_1	0.898316
opfh0005	0.898487
kn836_1	0.898575
opfl0117	0.898683
f22635_2	0.898762
n135_2	0.898786
b319	0.898898
m45317_9	0.898943
ks168_2	0.89941
m55888_6	0.899835
z_1_90	0.9001
m1042_1	0.900112
l2_194	0.900125
c419	0.90014
c538	0.900335
n134_91	0.900346
d6287_29	0.900385
m23823_3	0.900507
l2_73	0.90059
i1291_1	0.900592
n127_18	0.900609
j478_4	0.900655
n155_42	0.900657
kn3190_1	0.900662
b93	0.900799
opfblob0091	0.900872
j116_2	0.900972
ks85_8	0.901037
a8109_22	0.901059
n137_7	0.902045
j649_1	0.902154
opff72461	0.90217
m20208_1	0.902246
a14801_11	0.902405
f70599_1	0.902652
kn3690_1	0.902754
ks497_2	0.902891
m28007_3	0.902934
m22678_1	0.90299
c337	0.903144
n158_4	0.903151
opfl0079	0.903201
m951_1	0.903233
n152_17	0.903331
d56327_1	0.903651
n128_15	0.903666
f67281_1	0.903682
j22_5	0.903692
b556	0.903733
f7288_1	0.90377
kn3771_1	0.903921
opfl0092	0.903938
m33579_2	0.903995
a8109_21	0.903999
n142_1	0.904152
n137_11	0.904185
j183_1	0.904289
m33739_10	0.904293
n159_31	0.904325
a23157_14	0.904376
n153_1	0.904404
z_3_100	0.904458
e679_2	0.904488
n187_5	0.904944
m45468_2	0.904983
opfl0100	0.905204
f53897_1	0.905225
n147_18	0.905317
ks1480_3	0.905349
opfk12913	0.905382
f25016_1	0.90544
f13414_1	0.905652
n157_41	0.905701
e679_5	0.905715
opfg0060	0.905849
f20448_1	0.906074
f13529_1	0.906111
m18924_1	0.906263
f4675_1	0.906405
opfi17724	0.906594
f53081_2	0.906673
b328	0.906852
opff72464	0.907075
m4230_1	0.90722
kn1047_4	0.907344
n135_24	0.907406
n130_17	0.907413
f29632_5	0.907563
l3_29	0.907569
ks3_3	0.907579
n135_27	0.907591
m45597_4	0.907852
c169	0.907887
ks75_22	0.908121
n189_5	0.908417
n132_122	0.908653
f4501_1	0.908822
d16785_17	0.908844
a26463_4	0.909167
f36356_4	0.909436
n131_2	0.909972
f68714_2	0.909999
e17649_1	0.910008
e27300_2	0.910213
j414_1	0.910367
m49138_1	0.910401
kn2029_3	0.910475
f51945_3	0.910688
m55746_2	0.910725
c128	0.910833
kn3360_5	0.910878
f52120_1	0.911051
ks157_15	0.911161
d17715_110	0.911199
f21003_1	0.911199
n137_14	0.911315
m18924_16	0.911407
b177	0.911618
l2_70	0.911629
ks12_6	0.91163
i1923_1	0.911691
kn6869_1	0.912061
f11801_1	0.912106
m3928_2	0.912438
d15909_5	0.91301
m5455_1	0.91322
m33871_2	0.913257
ks202_10	0.913266
d33539_41	0.913335
f69951_2	0.913455
ks436_2	0.913499
f19549_1	0.913758
i17421_1	0.913888
n150_84	0.913916
f42072_1	0.91394
m11377_3	0.914132
a13231_2	0.914192
m25872_1	0.91428
m18924_9	0.914352
ks79_4	0.914423
ks316_17	0.914583
f71130_4	0.914618
m8686_1	0.914641
b270	0.914715
ks111_3	0.914844
i13369_2	0.914926
opfg0030	0.915032
f71176_5	0.91512
j170_1	0.915194
m25032_1	0.915237
i3668_1	0.915473
i3767_1	0.91548
kn7264_1	0.915585
f19409_1	0.915719
f52797_1	0.915784
n133_42	0.915876
d16785_36	0.915881
m58847_3	0.915956
j73_12	0.915966
d17715_22	0.915982
l2_248	0.916313
b524	0.916326
j167_6	0.916347
opfblob0055	0.916547
m6335_3	0.917046
a23157_12	0.917052
d6287_21	0.917109
d49176_36	0.917122
j246_2	0.917285
opfblob0009	0.917426
n141_48	0.91743
ks79_1	0.917621
kn1626_2	0.917623
i15927_1	0.917688
c394	0.917936
f22081_1	0.917937
n132_103	0.918363
j21_24	0.918468
f22741_1	0.918518
i9876_1	0.918991
opfblob0024	0.91913
f71182_3	0.919196
f53749_1	0.919272
f71022_1	0.919327
j70_2	0.919341
ks172_2	0.919342
ks586_1	0.919349
opfi17738	0.919397
e22930_3	0.919464
m35930_9	0.919488
n140_25	0.91951
m38757_6	0.919592
f53971_1	0.919646
e16122_5	0.919705
i15913_1	0.919791
a8010_11	0.919946
ks291_14	0.920062
j183_7	0.920092
f20792_1	0.920111
n168_36	0.920121
f70772_1	0.920152
opfg0039	0.920273
m38913_8	0.920329
opfc0751	0.920379
opfi17683	0.920555
m5172_1	0.920558
n157_7	0.920625
i3340_6	0.920854
ks225_7	0.921209
f49439_1	0.921217
opfn0277	0.921343
m49899_2	0.921427
f11920_1	0.921579
n162_3	0.921684
f12694_1	0.921688
ks625_2	0.921762
f5774_1	0.921793
m29861_2	0.921808
m45763_1	0.921814
e23643_1	0.922244
kn5905_5	0.922433
d17715_15	0.922509
b475	0.922509
f62396_2	0.922855
n159_4	0.922966
opfblob0095	0.922974
e20424_2	0.923176
d33539_23	0.923181
opfl0066	0.923383
a23157_1	0.923455
m35742_1	0.923519
n133_34	0.923605
kn5414_1	0.923674
b251	0.923953
e18550_1	0.923956
ks26_5	0.923967
a8010_31	0.924037
f20989_1	0.924208
m42736_1	0.924379
j6_4	0.924447
ks25_26	0.924465
i15505_1	0.924765
l2_193	0.924839
i11857_2	0.924841
l3_9	0.924909
d34948_2	0.924939
n159_30	0.924943
j269_5	0.924961
opfa32036	0.925092
opfl0157	0.925202
m45177_16	0.92527
e13462_1	0.925296
i11342_1	0.925322
f28758_1	0.925451
n128_30	0.925492
f45048_1	0.925645
d12635_25	0.925694
ks244_2	0.925788
n138_39	0.925827
kn3690_3	0.926269
ks26_26	0.926353
m37914_2	0.926422
d34646_1	0.92661
ks157_4	0.927139
opfm60465	0.927231
j43_14	0.927246
n151_18	0.927435
f3029_1	0.927634
ks56_31	0.927751
m45177_9	0.927782
ks56_18	0.928067
ks5580_5	0.928191
f36374_1	0.928306
d42243_39	0.928437
e18031_6	0.928592
n141_8	0.928619
f61293_1	0.928801
i1401_1	0.928897
m23550_1	0.929006
i14041_1	0.929068
opfblob0176	0.929141
n128_25	0.929177
opfl0135	0.929287
m196_8	0.929298
n128_24	0.929372
d23156_33	0.929416
c238	0.929483
m36520_1	0.929623
b180	0.929721
n133_47	0.929802
f33441_1	0.929926
m17691_2	0.929981
c370	0.930087
m47319_2	0.930149
b275	0.930677
opfg0045	0.9308
n147_6	0.930929
f28292_1	0.931187
f5206_9	0.93134
n231_1	0.931433
n130_37	0.931602
c97	0.93172
f10044_1	0.931872
i7404_1	0.931934
ks601_3	0.932439
j2975_2	0.932498
i4989_2	0.932899
l2_123	0.933013
i1568_2	0.933144
e19631_3	0.933213
f48197_1	0.933371
e11054_2	0.93345
n168_34	0.933492
m26914_8	0.933526
d17715_37	0.933632
n134_77	0.933758
m33739_2	0.934066
j162_1	0.93409
opfg0052	0.934189
opfm60553	0.934401
n132_147	0.934635
i10218_1	0.934697
i15461_2	0.934965
i4179_1	0.935036
j478_6	0.935104
j352_8	0.93511
a6420_1	0.93517
m3766_1	0.935499
ks44_10	0.935499
i14195_1	0.93552
z_7_50	0.935526
l2_98	0.935547
m36520_4	0.935597
j151_8	0.935904
m26245_9	0.935942
f29767_2	0.935992
opfm60531	0.936166
ks694_7	0.936317
e10359_5	0.936376
d12635_3	0.936573
e14176_2	0.936593
b225	0.936665
j248_9	0.93678
f37292_1	0.936949
f27351_1	0.937241
kn10286_1	0.937354
f68934_2	0.937538
kn8928_1	0.937605
e15548_1	0.937648
ks89_8	0.937668
b396	0.937778
c132	0.937893
m5441_1	0.937963
f43397_1	0.938039
opfb0673	0.938172
kn918_1	0.938204
f57777_1	0.93829
m38247_1	0.938861
m1840_2	0.939204
opfl0018	0.939626
i1664_2	0.939732
d6287_34	0.939808
f28782_1	0.940234
f47864_1	0.940268
f39079_1	0.940281
n147_13	0.940325
opfi17682	0.940592
m14_1	0.940674
opfi17718	0.940783
ks31_2	0.940844
l2_280	0.940866
ks44_11	0.941135
e8484_1	0.941192
n133_7	0.941304
i8083_1	0.941395
f46267_2	0.941406
a12696_3	0.941489
m56059_1	0.941588
opfh0014	0.941692
j82_7	0.94184
opfl0088	0.941937
b343	0.941987
m6522_4	0.942098
f45387_1	0.942359
i15363_2	0.942359
c233	0.942372
a31914_6	0.942442
f46705_1	0.942589
b387	0.942787
opfc0764	0.942858
n128_90	0.942969
m2511_7	0.943129
f47864_3	0.943147
n146_2	0.943377
c541	0.943401
opfblob0132	0.943577
d33539_66	0.943891
j53_16	0.943946
opfc0770	0.944067
b320	0.94438
d6287_31	0.944534
opfi17644	0.944708
f4524_3	0.944742
n143_18	0.944845
e20147_1	0.945027
opfblob0121	0.945131
f48446_1	0.945362
m196_2	0.945442
i6724_2	0.945465
c223	0.945525
c253	0.945602
n132_43	0.945697
f69725_1	0.945716
i4555_2	0.945824
m6483_3	0.945873
f46067_4	0.946114
f32129_1	0.946158
j111_5	0.946181
n152_13	0.946184
m3675_2	0.946185
opfblob0140	0.946406
l2_31	0.946543
i3002_1	0.947457
opfg0061	0.947483
opff72414	0.94751
opff72460	0.947756
j65_2	0.947759
f7809_2	0.947771
f48433_1	0.947977
f24941_2	0.948063
opfh0008	0.948195
m18376_1	0.94828
n137_44	0.948363
m38941_6	0.948436
n138_102	0.948674
ks694_2	0.948768
j50_1	0.949075
l2_81	0.949181
l1_101	0.949213
n140_3	0.949231
a8109_3	0.94928
i10565_1	0.949318
kn209_1	0.949359
z_7_90	0.949477
c681	0.949525
m45177_11	0.949605
e18550_2	0.949679
m55746_3	0.949693
m44397_1	0.94976
c49	0.949807
e25790_1	0.949822
ks157_13	0.949873
kn1255_4	0.949892
opfi17689	0.949956
n185_15	0.949975
e30064_1	0.949977
i13129_1	0.950069
l3_1	0.950142
opff72491	0.95026
i660_1	0.950313
m33739_6	0.950508
f47145_2	0.950605
opfk12898	0.950609
m21665_1	0.950805
i17505_1	0.950819
ks178_5	0.950956
j206_7	0.951012
l2_195	0.951072
f12076_1	0.951207
ks135_4	0.951461
j64_1	0.951591
f67443_1	0.951631
n153_7	0.951632
opfn0256	0.951663
l1_49	0.951792
e804_1	0.951801
ks72_6	0.951924
f65043_1	0.951963
n134_139	0.952174
b572	0.952379
kn2880_1	0.952422
f16755_1	0.952426
j461_5	0.952467
n243_1	0.952503
opfblob0040	0.952536
opfblob0181	0.952573
e19278_2	0.952956
d12635_1	0.95296
i791_2	0.953026
kn3773_1	0.953305
ks80_1	0.953436
[truncated: 2,640 more rows]

## Sheet: Pearson correlations
HB3 timepoint (hours post infection)	1	2	3	4	5	6	7	8	9	10	11	12	13	14	15	16	17	18	19	20	21	22	23	24	25	26	27	28	29	30	31	32	33	34	35	36	37	38	39	40	41	42	43	44	45	46	47	48
Pearson (K1 ring:HB3)	0.123823	0.150011	0.225695	0.1999	0.248818	0.262315	0.253899	0.262245	0.247161	0.254932	0.223062	0.251683	0.229437	0.171508	0.146773	0.148503	0.115096	0.0678066	0.0248353	0.0113996	0.0229829	0.0105145		-0.0580648	-0.0595501	-0.0758785	-0.12902	-0.129451		-0.175554	-0.185831	-0.227505	-0.219715	-0.233704	-0.206033	-0.185846	-0.18477	-0.157878	-0.138549	-0.109973	-0.061648	-0.0307627	0.0384904	0.0597821	0.0925331	0.142642	0.131753	0.178087
Pearson (K1 Trophozoite:HB3)	-0.183613	-0.173553	-0.104171	-0.0992938	-0.061237	-0.0288274	-0.0314424	0.00364559	0.0476908	0.0498167	0.0492553	0.098751	0.115049	0.108657	0.127001	0.159567	0.153772	0.152616	0.145197	0.186675	0.233647	0.195401		0.191451	0.174315	0.177632	0.170119	0.142769		0.0851504	0.0747411	0.0161292	-0.000269165	-0.0897087	-0.129476	-0.178073	-0.18405	-0.184249	-0.204986	-0.216777	-0.203133	-0.187584	-0.200264	-0.183657	-0.202189	-0.158139	-0.163884	-0.173909
Pearson (K1 Schizont:HB3)	0.0440405	0.000572659	-0.104201	-0.11699	-0.119648	-0.140549	-0.173289	-0.157552	-0.220501	-0.202205	-0.225973	-0.225924	-0.216006	-0.244507	-0.251956	-0.237207	-0.20984	-0.219814	-0.211503	-0.203864	-0.220835	-0.164634		-0.126713	-0.117397	-0.0658593	-0.0750237	-0.021664		0.0440826	0.0782826	0.128839	0.176349	0.230795	0.281135	0.277575	0.266079	0.271887	0.266849	0.255331	0.205414	0.167792	0.0988648	0.0966891	0.0660866	0.0407014	0.0263108	0.012694
